# Supplementary material for: Identification of a Nine-Gene Signature and Establishment of a Prognostic Nomogram Predicting Overall Survival of Pancreatic Cancer
Source: Front Oncol. 2019 Sep 27;9:996. doi: 10.3389/fonc.2019.00996 (PMC6776930; doi:10.3389/fonc.2019.00996)
Supplement: Supplementary Table 1 — 234 DEGs identified by integrated analysis using Robust rank aggregation (RRA) method with p < 0.05. [file Table_1.XLSX]

## Sheet: Sheet1
supplementary table1. 234 DEGs identified by integrated analysis using Robust rank aggregation (RRA) method with p<0.05
Gene	Regulated	Score
ITGA2	Up	2.26514e-11
TMPRSS4	Up	5.4846e-10
LAMC2	Up	2.41496e-09
KRT19	Up	1.14546e-08
GJB2	Up	3.19891e-08
ANO1	Up	1.78177e-07
AHNAK2	Up	2.24457e-07
S100P	Up	2.56595e-07
LAMB3	Up	4.2407e-07
SERPINB5	Up	5.47087e-07
MBOAT2	Up	8.10785e-07
GPRC5A	Up	1.66005e-06
SLC2A1	Up	1.82373e-06
COL10A1	Up	3.16674e-06
TSPAN1	Up	4.0493e-06
COL11A1	Up	4.98347e-06
SLC6A14	Up	5.19552e-06
IFI27	Up	5.69822e-06
AGR2	Up	1.15035e-05
CEACAM5	Up	1.39946e-05
SDR16C5	Up	1.4914e-05
MLPH	Up	1.7963e-05
STYK1	Up	2.46125e-05
CDH3	Up	3.36206e-05
SLPI	Up	3.93651e-05
SULF1	Up	3.95187e-05
INHBA	Up	5.57985e-05
POSTN	Up	5.75523e-05
GALNT5	Up	5.80679e-05
NQO1	Up	5.89213e-05
FN1	Up	6.45512e-05
CAPG	Up	6.45512e-05
PLEK2	Up	6.74077e-05
S100A6	Up	7.05839e-05
COL17A1	Up	7.37129e-05
ANLN	Up	7.38775e-05
FXYD3	Up	8.08294e-05
CTSE	Up	9.63096e-05
ARNTL2	Up	0.000106015
ADAM9	Up	0.000120802
ABHD17C	Up	0.000136784
FGD6	Up	0.000139636
CEACAM6	Up	0.000141157
PLAU	Up	0.000155515
FERMT1	Up	0.000186908
ITGA3	Up	0.000197138
FBXO32	Up	0.000333045
DKK1	Up	0.000379488
OSBPL3	Up	0.00042973
TMC5	Up	0.000458567
S100A16	Up	0.000657744
MYOF	Up	0.000690365
ANKRD22	Up	0.000693806
MST1R	Up	0.000759163
S100A14	Up	0.000819772
TRIM29	Up	0.00106715
KCNN4	Up	0.00112526
VCAN	Up	0.00112526
THBS2	Up	0.00130818
HK2	Up	0.0013408
LIPH	Up	0.00137406
COL1A1	Up	0.00144252
LCN2	Up	0.00153536
FNDC1	Up	0.00178434
SULF2	Up	0.00182591
NOX4	Up	0.00186824
PPAPDC1A	Up	0.00186824
GABRP	Up	0.00192585
IGFBP3	Up	0.00196039
GCNT3	Up	0.00199986
FAP	Up	0.0020453
FHL2	Up	0.00243863
CTHRC1	Up	0.00249873
RHBDL2	Up	0.00254482
S100A11	Up	0.00259552
SLC44A4	Up	0.00260046
BCAS1	Up	0.00260046
CST1	Up	0.0026843
TNFAIP6	Up	0.00294922
COL1A2	Up	0.00301072
TFF1	Up	0.00333342
OCIAD2	Up	0.00347639
COL3A1	Up	0.00361047
RUNX2	Up	0.00373014
LY75	Up	0.0040505
TMEM45B	Up	0.00429943
TNS4	Up	0.00469047
TMC7	Up	0.00495317
GPX2	Up	0.00499398
ACSL5	Up	0.00510822
LAMA3	Up	0.00522519
NMU	Up	0.00525323
TSPAN8	Up	0.00608788
PLAC8	Up	0.00635324
TCN1	Up	0.0065201
MALL	Up	0.00664261
CDH11	Up	0.00699376
MXRA5	Up	0.00723574
ASAP2	Up	0.00840555
MMP7	Up	0.00854454
EDNRA	Up	0.00861317
PTK6	Up	0.00867867
EFNA5	Up	0.00882446
C19orf33	Up	0.00887293
IGFL2	Up	0.00970714
PLAUR	Up	0.0104096
HN1	Up	0.0105188
MET	Up	0.0114101
MMP11	Up	0.0117059
MSLN	Up	0.0124324
TRIM31	Up	0.0127363
PLAT	Up	0.0127363
LMO7	Up	0.0130024
COMP	Up	0.0144809
CST2	Up	0.015735
APOL1	Up	0.0163903
UGT1A6	Up	0.0165885
ADAMTS12	Up	0.0171753
ERO1L	Up	0.0177752
MATN3	Up	0.0199624
IGF2BP3	Up	0.0201242
COL5A2	Up	0.0207382
CEACAM1	Up	0.0209737
CLDN18	Up	0.0215352
CAPN8	Up	0.0237777
ANXA2P2	Up	0.0237777
CORO2A	Up	0.0240569
KLK10	Up	0.0249421
DPYSL3	Up	0.0249421
CXCL5	Up	0.0251234
SDC1	Up	0.0253886
FUT3	Up	0.0258501
ANXA10	Up	0.0263128
COL6A3	Up	0.0263128
SRPX2	Up	0.0267813
ITGB6	Up	0.0276005
EFNB2	Up	0.0277802
OAS1	Up	0.0287147
SCEL	Up	0.0292311
ITGB4	Up	0.0295655
COL12A1	Up	0.0312677
TOP2A	Up	0.0324267
EGLN3	Up	0.0328741
DPCR1	Up	0.0334223
CTSK	Up	0.0351054
FOXQ1	Up	0.036352
ADAM28	Up	0.0365943
SEMA3C	Up	0.0368474
SFN	Up	0.0383485
FBN1	Up	0.0392634
SYTL2	Up	0.0405122
CCL20	Up	0.043093
BLACAT1	Up	0.0431415
MTMR11	Up	0.0433961
PVRL4	Up	0.0444662
FAM83D	Up	0.0446233
MMP1	Up	0.0450193
S100A10	Up	0.0466552
CEP55	Up	0.0481982
GPX8	Up	0.0489096
AOX1	Down	2.29084e-06
KIAA1324	Down	7.90262e-06
PDK4	Down	1.69059e-05
EPHX2	Down	2.62714e-05
BTG2	Down	3.16173e-05
PAIP2B	Down	0.000107628
MT1G	Down	0.000184254
SLC39A5	Down	0.000224855
ERO1LB	Down	0.000545685
LIFR	Down	0.000749287
FLRT2	Down	0.000756313
FAM107A	Down	0.000867734
SLC43A1	Down	0.00112327
RGN	Down	0.00155229
BACE1	Down	0.00165505
CTNND2	Down	0.00170839
F8	Down	0.00181911
DPT	Down	0.0020424
NRCAM	Down	0.00312192
LMO3	Down	0.00312192
GNMT	Down	0.00322452
BNIP3	Down	0.00344709
SLC7A2	Down	0.00350904
FAM150B	Down	0.00383694
ACADL	Down	0.00426029
FREM1	Down	0.00457248
IAPP	Down	0.00539282
TTN	Down	0.00577345
TMED6	Down	0.00603501
GAMT	Down	0.00631052
SLC17A4	Down	0.00631052
RBPJL	Down	0.00701809
CD36	Down	0.00832228
EGF	Down	0.00852317
GUCA1C	Down	0.00918391
TRHDE	Down	0.00948488
DPP10	Down	0.010108
ALB	Down	0.0107446
CLU	Down	0.0119331
SIDT2	Down	0.0119808
C5	Down	0.0126314
MT1E	Down	0.013807
CBFA2T3	Down	0.0147174
CXCL12	Down	0.0154584
RP11-391M1.4	Down	0.0170105
NRG4	Down	0.0175823
SLC25A45	Down	0.0179489
AQP12A	Down	0.0204033
PDIA2	Down	0.0213133
SLC4A4	Down	0.0258154
PAK3	Down	0.0273119
CCDC69	Down	0.0277822
MT1M	Down	0.0277822
IL22RA1	Down	0.0290219
ANPEP	Down	0.0295228
FGL1	Down	0.0305363
ADHFE1	Down	0.0305578
SERPINI2	Down	0.0310422
PDZK1	Down	0.0318193
MCOLN3	Down	0.0318428
AQP8	Down	0.0325473
S100A12	Down	0.03441
BRSK2	Down	0.03441
KCNJ8	Down	0.03441
LONRF2	Down	0.03441
MT1JP	Down	0.03441
BEX1	Down	0.0348019
NUCB2	Down	0.0371642
OR8D4	Down	0.0436807
KLK1	Down	0.0440119
NR5A2	Down	0.0449257
FAM46C	Down	0.0451417
ADH1B	Down	0.0477469
SLC16A12	Down	0.049804
