# Supplementary material for: Identification of a Nine-Gene Signature and Establishment of a Prognostic Nomogram Predicting Overall Survival of Pancreatic Cancer
Source: Front Oncol. 2019 Sep 27;9:996. doi: 10.3389/fonc.2019.00996 (PMC6776930; doi:10.3389/fonc.2019.00996)
Supplement: Supplementary Table 2 — Functional enrichment analysis of the DEGs. [file Table_2.XLSX]

## Sheet: GO-BP
Category	Term	Count	%	PValue	Genes	List Total	Pop Hits	Pop Total	Fold Enrichment	Bonferroni	Benjamini	FDR
GOTERM_BP_DIRECT	GO:0030198~extracellular matrix organization	21	9.17031	5.39971e-13	MATN3, COL3A1, FBN1, ITGB4, ITGA2, ITGA3, POSTN, COL5A2, LAMB3, LAMA3, SERPINB5, COMP, COL6A3, ITGB6, COL1A2, LAMC2, VCAN, COL1A1, COL11A1, FN1, COL10A1	211	196	16792	8.52674	6.82576e-10	6.82576e-10	8.78664e-10
GOTERM_BP_DIRECT	GO:0007155~cell adhesion	28	12.2271	2.30449e-11	ITGB4, FERMT1, CTNND2, POSTN, CDH3, CXCL12, LAMB3, COMP, FAP, MSLN, ITGB6, COL6A3, COL12A1, THBS2, CEACAM1, DPT, ADAM9, FN1, EFNB2, ITGA2, ITGA3, TNFAIP6, LAMA3, CD36, LAMC2, VCAN, COL1A1, CDH11	211	459	16792	4.85473	2.91288e-08	1.45644e-08	3.74968e-08
GOTERM_BP_DIRECT	GO:0030574~collagen catabolic process	12	5.24017	3.74916e-10	CTSK, COL3A1, COL6A3, COL1A2, MMP7, COL12A1, COL1A1, COL11A1, COL5A2, MMP1, COL10A1, MMP11	211	64	16792	14.9218	4.73894e-07	1.57965e-07	6.10034e-07
GOTERM_BP_DIRECT	GO:0022617~extracellular matrix disassembly	10	4.36681	4.35025e-07	CTSK, LAMB3, LAMA3, CAPG, FBN1, MMP7, LAMC2, MMP1, MMP11, FN1	211	76	16792	10.4714	0.00054972	0.000137458	0.000707835
GOTERM_BP_DIRECT	GO:0030199~collagen fibril organization	8	3.49345	4.74117e-07	COL3A1, COL1A2, COL12A1, COL1A1, COL11A1, COL5A2, MMP11, DPT	211	39	16792	16.3247	0.000599105	0.00011985	0.000771443
GOTERM_BP_DIRECT	GO:0001501~skeletal system development	12	5.24017	1.20432e-06	MATN3, COMP, COL3A1, FBN1, COL1A2, COL12A1, POSTN, VCAN, COL1A1, COL5A2, COL10A1, CDH11	211	137	16792	6.97077	0.0015211	0.000253678	0.00195955
GOTERM_BP_DIRECT	GO:0007160~cell-matrix adhesion	10	4.36681	1.8543e-06	COL17A1, FREM1, COL3A1, MSLN, ITGB6, ITGB4, ITGA2, ITGA3, ADAMTS12, ADAM9	211	90	16792	8.84255	0.00234109	0.000334777	0.00301712
GOTERM_BP_DIRECT	GO:0031581~hemidesmosome assembly	5	2.18341	1.08773e-05	COL17A1, LAMB3, LAMA3, ITGB4, LAMC2	211	12	16792	33.1596	0.0136548	0.00171714	0.0176971
GOTERM_BP_DIRECT	GO:0035987~endodermal cell differentiation	6	2.62009	1.8818e-05	INHBA, LAMB3, LAMA3, COL12A1, COL11A1, FN1	211	27	16792	17.6851	0.0235055	0.00263942	0.0306148
GOTERM_BP_DIRECT	GO:0006508~proteolysis	18	7.86026	0.000189866	ADAM28, PLAT, TRHDE, CAPN8, DPP10, F8, MMP7, ANPEP, KLK1, MMP1, TMPRSS4, MMP11, CTSK, FAP, BACE1, KLK10, LONRF2, PLAU	211	500	16792	2.86499	0.213383	0.0237156	0.308487
GOTERM_BP_DIRECT	GO:0048333~mesodermal cell differentiation	4	1.74672	0.000295441	INHBA, ITGB4, ITGA2, ITGA3	211	11	16792	28.9393	0.311674	0.033384	0.479636
GOTERM_BP_DIRECT	GO:0001666~response to hypoxia	10	4.36681	0.000319189	EDNRA, PLAT, NOX4, EGLN3, BNIP3, ITGA2, POSTN, CBFA2T3, CXCL12, PLAU	211	172	16792	4.62692	0.332035	0.0330675	0.518095
GOTERM_BP_DIRECT	GO:0033627~cell adhesion mediated by integrin	4	1.74672	0.000785145	ITGB6, FBN1, ITGA2, ADAM9	211	15	16792	21.2221	0.629467	0.0735269	1.26989
GOTERM_BP_DIRECT	GO:0002063~chondrocyte development	4	1.74672	0.000785145	SULF2, SULF1, RUNX2, COL11A1	211	15	16792	21.2221	0.629467	0.0735269	1.26989
GOTERM_BP_DIRECT	GO:0072593~reactive oxygen species metabolic process	5	2.18341	0.000918496	NOX4, AOX1, PDK4, EPHX2, BNIP3	211	35	16792	11.369	0.686987	0.0796168	1.48407
GOTERM_BP_DIRECT	GO:0016477~cell migration	9	3.93013	0.00146538	FAM83D, CTHRC1, STYK1, SDC1, TSPAN1, PTK6, ADAMTS12, CEACAM1, ADAM9	211	172	16792	4.16422	0.843328	0.116243	2.35786
GOTERM_BP_DIRECT	GO:0007229~integrin-mediated signaling pathway	7	3.05677	0.00152003	COL3A1, ITGB6, ITGB4, ITGA2, ITGA3, CEACAM1, ADAM9	211	99	16792	5.62708	0.8538	0.113233	2.44477
GOTERM_BP_DIRECT	GO:0045926~negative regulation of growth	4	1.74672	0.00161158	MT1M, PTK6, MT1E, MT1G	211	19	16792	16.7543	0.869799	0.113011	2.59021
GOTERM_BP_DIRECT	GO:0002576~platelet degranulation	7	3.05677	0.00186147	CD36, ALB, CLU, F8, EGF, TTN, FN1	211	103	16792	5.40855	0.905115	0.12264	2.98616
GOTERM_BP_DIRECT	GO:0042060~wound healing	6	2.62009	0.00328094	SDC1, CCL20, COL3A1, TFF1, CDH3, FN1	211	80	16792	5.96872	0.984297	0.196379	5.20681
GOTERM_BP_DIRECT	GO:0050900~leukocyte migration	7	3.05677	0.00433074	COL1A2, CEACAM6, ITGA3, COL1A1, CEACAM1, MMP1, FN1	211	122	16792	4.56623	0.995855	0.239894	6.81835
GOTERM_BP_DIRECT	GO:0043589~skin morphogenesis	3	1.31004	0.00528875	COL1A2, ITGA2, COL1A1	211	9	16792	26.5276	0.998772	0.273253	8.26652
GOTERM_BP_DIRECT	GO:0006954~inflammatory response	12	5.24017	0.00828171	NOX4, LY75, TNFAIP6, SDC1, CXCL5, CCL20, C5, AOX1, ITGB6, EPHX2, CXCL12, S100A12	211	379	16792	2.51978	0.999973	0.379856	12.6559
GOTERM_BP_DIRECT	GO:0007596~blood coagulation	8	3.49345	0.0085077	PLAT, CD36, F8, COL1A2, ITGA2, COL1A1, PLAU, PLAUR	211	184	16792	3.46013	0.99998	0.374719	12.9792
GOTERM_BP_DIRECT	GO:0043588~skin development	4	1.74672	0.00867413	COL3A1, ITGB4, ITGA3, COL5A2	211	34	16792	9.3627	0.999983	0.367977	13.2165
GOTERM_BP_DIRECT	GO:0007267~cell-cell signaling	9	3.93013	0.0147075	INHBA, TNFAIP6, TRHDE, CXCL5, CCL20, IAPP, EFNB2, CEACAM6, GJB2	211	254	16792	2.81987	1	0.527224	21.4226
GOTERM_BP_DIRECT	GO:0043434~response to peptide hormone	4	1.74672	0.0175295	BTG2, COL1A1, TFF1, CXCL12	211	44	16792	7.23481	1	0.576737	25.0055
GOTERM_BP_DIRECT	GO:0006935~chemotaxis	6	2.62009	0.0186221	CXCL5, CCL20, C5, CXCL12, PLAU, PLAUR	211	122	16792	3.91392	1	0.585221	26.3511
GOTERM_BP_DIRECT	GO:0061178~regulation of insulin secretion involved in cellular response to glucose stimulus	3	1.31004	0.0187103	BRSK2, EFNA5, SIDT2	211	17	16792	14.044	1	0.573712	26.4588
GOTERM_BP_DIRECT	GO:0071230~cellular response to amino acid stimulus	4	1.74672	0.0208868	COL3A1, COL1A2, COL1A1, COL5A2	211	47	16792	6.77302	1	0.601488	29.0683
GOTERM_BP_DIRECT	GO:0008544~epidermis development	5	2.18341	0.0219246	COL17A1, LAMB3, LAMA3, LAMC2, SCEL	211	85	16792	4.68135	1	0.607035	30.2818
GOTERM_BP_DIRECT	GO:0071294~cellular response to zinc ion	3	1.31004	0.0231446	MT1M, MT1E, MT1G	211	19	16792	12.5657	1	0.615108	31.6833
GOTERM_BP_DIRECT	GO:0071560~cellular response to transforming growth factor beta stimulus	4	1.74672	0.0233071	NOX4, FBN1, POSTN, COL1A1	211	49	16792	6.49657	1	0.606049	31.868
GOTERM_BP_DIRECT	GO:0014846~esophagus smooth muscle contraction	2	0.873362	0.0248562	SULF2, SULF1	211	2	16792	79.5829	1	0.618674	33.6053
GOTERM_BP_DIRECT	GO:0014911~positive regulation of smooth muscle cell migration	3	1.31004	0.0255074	NOX4, ITGA2, POSTN	211	20	16792	11.9374	1	0.617329	34.323
GOTERM_BP_DIRECT	GO:0032355~response to estradiol	5	2.18341	0.0273317	IFI27, POSTN, COL1A1, NQO1, GJB2	211	91	16792	4.37269	1	0.632417	36.2952
GOTERM_BP_DIRECT	GO:0042730~fibrinolysis	3	1.31004	0.0279638	PLAT, PLAU, PLAUR	211	21	16792	11.369	1	0.630584	36.9655
GOTERM_BP_DIRECT	GO:0007165~signal transduction	23	10.0437	0.033691	LY75, S100A6, TRHDE, GUCA1C, CXCL5, MET, S100A11, CTNND2, SFN, GPRC5A, CXCL12, PLAUR, EDNRA, TNFAIP6, CCL20, IAPP, CEACAM6, MST1R, EGF, RBPJL, PLAU, NMU, GABRP	211	1161	16792	1.57658	1	0.689879	42.7442
GOTERM_BP_DIRECT	GO:0045742~positive regulation of epidermal growth factor receptor signaling pathway	3	1.31004	0.0358676	PTK6, AGR2, PLAUR	211	24	16792	9.94787	1	0.703287	44.8069
GOTERM_BP_DIRECT	GO:0051592~response to calcium ion	4	1.74672	0.0359952	SDC1, S100A16, TTN, ADAM9	211	58	16792	5.48848	1	0.695208	44.9256
GOTERM_BP_DIRECT	GO:0030201~heparan sulfate proteoglycan metabolic process	2	0.873362	0.0370528	SULF2, SULF1	211	3	16792	53.0553	1	0.696724	45.9006
GOTERM_BP_DIRECT	GO:0043406~positive regulation of MAP kinase activity	4	1.74672	0.0375846	NOX4, MST1R, EGF, S100A12	211	59	16792	5.39545	1	0.693042	46.3847
GOTERM_BP_DIRECT	GO:0009612~response to mechanical stimulus	4	1.74672	0.0375846	BTG2, COL3A1, POSTN, CXCL12	211	59	16792	5.39545	1	0.693042	46.3847
GOTERM_BP_DIRECT	GO:0016337~single organismal cell-cell adhesion	5	2.18341	0.037972	NRCAM, SRPX2, CTNND2, LMO7, CDH3	211	101	16792	3.93975	1	0.688089	46.7348
GOTERM_BP_DIRECT	GO:0060135~maternal process involved in female pregnancy	3	1.31004	0.0386717	IFI27, MMP7, ITGA3	211	25	16792	9.54995	1	0.686304	47.3616
GOTERM_BP_DIRECT	GO:0070372~regulation of ERK1 and ERK2 cascade	3	1.31004	0.0386717	FAM83D, CEACAM1, FN1	211	25	16792	9.54995	1	0.686304	47.3616
GOTERM_BP_DIRECT	GO:0001958~endochondral ossification	3	1.31004	0.0415564	COL1A1, RUNX2, COL10A1	211	26	16792	9.18265	1	0.704568	49.8737
GOTERM_BP_DIRECT	GO:0001649~osteoblast differentiation	5	2.18341	0.0415664	FHL2, VCAN, COL1A1, RUNX2, IGFBP3	211	104	16792	3.8261	1	0.696543	49.8822
GOTERM_BP_DIRECT	GO:0051965~positive regulation of synapse assembly	4	1.74672	0.0425648	FLRT2, SRPX2, EFNA5, THBS2	211	62	16792	5.13438	1	0.697365	50.7249
GOTERM_BP_DIRECT	GO:0007586~digestion	4	1.74672	0.0442948	CAPN8, CTSE, TFF1, NMU	211	63	16792	5.05288	1	0.704308	52.1538
GOTERM_BP_DIRECT	GO:0010575~positive regulation of vascular endothelial growth factor production	3	1.31004	0.0445193	SULF2, C5, SULF1	211	27	16792	8.84255	1	0.698577	52.3364
GOTERM_BP_DIRECT	GO:0042476~odontogenesis	3	1.31004	0.0445193	INHBA, SDC1, COL1A2	211	27	16792	8.84255	1	0.698577	52.3364
GOTERM_BP_DIRECT	GO:0043388~positive regulation of DNA binding	3	1.31004	0.047558	ITGA2, EGF, PLAUR	211	28	16792	8.52674	1	0.715475	54.7439
GOTERM_BP_DIRECT	GO:0008217~regulation of blood pressure	4	1.74672	0.0478584	EDNRA, TRHDE, COL1A2, EPHX2	211	65	16792	4.89741	1	0.710549	54.9755
GOTERM_BP_DIRECT	GO:0060326~cell chemotaxis	4	1.74672	0.0478584	CXCL5, CCL20, C5, CXCL12	211	65	16792	4.89741	1	0.710549	54.9755
GOTERM_BP_DIRECT	GO:2001205~negative regulation of osteoclast development	2	0.873362	0.0490975	CLDN18, FBN1	211	4	16792	39.7915	1	0.712846	55.9195
GOTERM_BP_DIRECT	GO:0009615~response to virus	5	2.18341	0.0493141	LCN2, CLU, OAS1, MST1R, CXCL12	211	110	16792	3.61741	1	0.707496	56.0826
GOTERM_BP_DIRECT	GO:0071356~cellular response to tumor necrosis factor	5	2.18341	0.0493141	LCN2, CCL20, POSTN, COL1A1, ADAMTS12	211	110	16792	3.61741	1	0.707496	56.0826
GOTERM_BP_DIRECT	GO:0006952~defense response	4	1.74672	0.0515585	KCNN4, INHBA, MST1R, CXCL12	211	67	16792	4.75122	1	0.717041	57.7395
GOTERM_BP_DIRECT	GO:0090004~positive regulation of establishment of protein localization to plasma membrane	3	1.31004	0.0538534	DPP10, ITGA3, AGR2	211	30	16792	7.95829	1	0.726316	59.373
GOTERM_BP_DIRECT	GO:0048706~embryonic skeletal system development	3	1.31004	0.0538534	SULF2, SULF1, COL1A1	211	30	16792	7.95829	1	0.726316	59.373
GOTERM_BP_DIRECT	GO:0098609~cell-cell adhesion	8	3.49345	0.054341	S100P, TRIM29, CAPG, S100A11, ANLN, SFN, GPRC5A, CEACAM1	211	271	16792	2.34931	1	0.723092	59.7123
GOTERM_BP_DIRECT	GO:0071260~cellular response to mechanical stimulus	4	1.74672	0.0593601	MMP7, BNIP3, ITGA2, COL1A1	211	71	16792	4.48355	1	0.748737	63.054
GOTERM_BP_DIRECT	GO:0050873~brown fat cell differentiation	3	1.31004	0.0604245	LAMB3, BNIP3, PLAC8	211	32	16792	7.4609	1	0.748957	63.7285
GOTERM_BP_DIRECT	GO:0035860~glial cell-derived neurotrophic factor receptor signaling pathway	2	0.873362	0.0609923	SULF2, SULF1	211	5	16792	31.8332	1	0.746268	64.0835
GOTERM_BP_DIRECT	GO:0031346~positive regulation of cell projection organization	2	0.873362	0.0609923	LCN2, ITGA2	211	5	16792	31.8332	1	0.746268	64.0835
GOTERM_BP_DIRECT	GO:0001525~angiogenesis	7	3.05677	0.0622182	NRCAM, SRPX2, FAP, ANPEP, EGF, CEACAM1, FN1	211	223	16792	2.49812	1	0.747468	64.8388
GOTERM_BP_DIRECT	GO:0015758~glucose transport	3	1.31004	0.063808	EDNRA, SLC2A1, HK2	211	33	16792	7.23481	1	0.750681	65.7963
GOTERM_BP_DIRECT	GO:0010951~negative regulation of endopeptidase activity	5	2.18341	0.0654364	SERPINB5, C5, COL6A3, SLPI, SERPINI2	211	121	16792	3.28855	1	0.753976	66.7516
GOTERM_BP_DIRECT	GO:0050919~negative chemotaxis	3	1.31004	0.0672538	FLRT2, SEMA3C, EFNA5	211	34	16792	7.02202	1	0.758139	67.7882
GOTERM_BP_DIRECT	GO:0048565~digestive tract development	3	1.31004	0.0707601	CLDN18, COL3A1, ITGB4	211	35	16792	6.82139	1	0.770631	69.7028
GOTERM_BP_DIRECT	GO:0006865~amino acid transport	3	1.31004	0.0707601	SLC7A2, SLC6A14, SLC43A1	211	35	16792	6.82139	1	0.770631	69.7028
GOTERM_BP_DIRECT	GO:0006810~transport	9	3.93013	0.0715216	TMED6, ALB, SLC7A2, AQP8, SLC6A14, SLC25A45, SLC4A4, PDZK1, GJB2	211	348	16792	2.05818	1	0.769063	70.1043
GOTERM_BP_DIRECT	GO:1903715~regulation of aerobic respiration	2	0.873362	0.072739	BNIP3, CBFA2T3	211	6	16792	26.5276	1	0.769747	70.7358
GOTERM_BP_DIRECT	GO:0001957~intramembranous ossification	2	0.873362	0.072739	CTSK, COL1A1	211	6	16792	26.5276	1	0.769747	70.7358
GOTERM_BP_DIRECT	GO:0006805~xenobiotic metabolic process	4	1.74672	0.0742513	UGT1A6, EPHX2, NQO1, S100A12	211	78	16792	4.08118	1	0.771812	71.5028
GOTERM_BP_DIRECT	GO:0001503~ossification	4	1.74672	0.0787829	RUNX2, COL11A1, COL5A2, CDH11	211	80	16792	3.97915	1	0.78735	73.6896
GOTERM_BP_DIRECT	GO:0046718~viral entry into host cell	4	1.74672	0.0787829	EFNB2, ITGB6, ITGA2, ANPEP	211	80	16792	3.97915	1	0.78735	73.6896
GOTERM_BP_DIRECT	GO:0030335~positive regulation of cell migration	6	2.62009	0.0815039	TNFAIP6, CEACAM6, SEMA3C, LAMC2, COL1A1, PLAU	211	184	16792	2.5951	1	0.794093	74.926
GOTERM_BP_DIRECT	GO:0038128~ERBB2 signaling pathway	3	1.31004	0.0816207	NRG4, PTK6, EGF	211	38	16792	6.28286	1	0.789812	74.9778
GOTERM_BP_DIRECT	GO:0042157~lipoprotein metabolic process	3	1.31004	0.0816207	SDC1, APOL1, ALB	211	38	16792	6.28286	1	0.789812	74.9778
GOTERM_BP_DIRECT	GO:0001568~blood vessel development	3	1.31004	0.0816207	COL1A2, COL1A1, CEACAM1	211	38	16792	6.28286	1	0.789812	74.9778
GOTERM_BP_DIRECT	GO:0042127~regulation of cell proliferation	6	2.62009	0.0831084	STYK1, PTK6, EGLN3, S100A11, NR5A2, PLAU	211	185	16792	2.58107	1	0.791277	75.6293
GOTERM_BP_DIRECT	GO:0046500~S-adenosylmethionine metabolic process	2	0.873362	0.0843394	GAMT, GNMT	211	7	16792	22.738	1	0.791663	76.1562
GOTERM_BP_DIRECT	GO:0000302~response to reactive oxygen species	3	1.31004	0.0853484	NOX4, GPX2, GPX8	211	39	16792	6.12176	1	0.791156	76.5802
GOTERM_BP_DIRECT	GO:0009636~response to toxic substance	4	1.74672	0.0906218	SDC1, SLC6A14, EPHX2, NQO1	211	85	16792	3.74508	1	0.806955	78.6831
GOTERM_BP_DIRECT	GO:0001822~kidney development	4	1.74672	0.0930741	SULF2, KCNJ8, SULF1, RGN	211	86	16792	3.70153	1	0.811513	79.5994
GOTERM_BP_DIRECT	GO:0006928~movement of cell or subcellular component	4	1.74672	0.0930741	SERPINB5, MST1R, SERPINI2, PLAUR	211	86	16792	3.70153	1	0.811513	79.5994
GOTERM_BP_DIRECT	GO:0071711~basement membrane organization	2	0.873362	0.0957954	FLRT2, MMP11	211	8	16792	19.8957	1	0.81679	80.573
GOTERM_BP_DIRECT	GO:0090181~regulation of cholesterol metabolic process	2	0.873362	0.0957954	EPHX2, ACADL	211	8	16792	19.8957	1	0.81679	80.573
GOTERM_BP_DIRECT	GO:0042117~monocyte activation	2	0.873362	0.0957954	MT1G, ADAM9	211	8	16792	19.8957	1	0.81679	80.573
GOTERM_BP_DIRECT	GO:0040036~regulation of fibroblast growth factor receptor signaling pathway	2	0.873362	0.0957954	SULF1, RUNX2	211	8	16792	19.8957	1	0.81679	80.573
GOTERM_BP_DIRECT	GO:0060100~positive regulation of phagocytosis, engulfment	2	0.873362	0.0957954	CD36, ITGA2	211	8	16792	19.8957	1	0.81679	80.573
GOTERM_BP_DIRECT	GO:0014909~smooth muscle cell migration	2	0.873362	0.0957954	PLAT, PLAU	211	8	16792	19.8957	1	0.81679	80.573

## Sheet: GO-CC
Category	Term	Count	%	PValue	Genes	List Total	Pop Hits	Pop Total	Fold Enrichment	Bonferroni	Benjamini	FDR
GOTERM_CC_DIRECT	GO:0005615~extracellular space	56	24.4541	4.57534e-16	CTHRC1, NRG4, MMP7, ANPEP, POSTN, CXCL12, IAPP, FAP, CEACAM6, COL12A1, SEMA3C, ADAM9, F8, CST2, CST1, TCN1, TNFAIP6, CTSK, CD36, SERPINB5, NUCB2, COL1A2, SLPI, LAMC2, VCAN, COL1A1, CXCL5, C5, COL3A1, CLU, SFN, CCL20, ALB, COMP, MSLN, COL6A3, TFF1, EGF, DPT, FN1, PLAT, FLRT2, FBN1, S100A11, DPYSL3, SERPINI2, LCN2, DKK1, APOL1, SULF2, SRPX2, SULF1, LIPH, AGR2, IGFBP3, PLAU	221	1347	18224	3.42825	9.10383e-14	9.10383e-14	5.55112e-13
GOTERM_CC_DIRECT	GO:0070062~extracellular exosome	79	34.4978	1.64165e-13	S100A6, TSPAN1, MLPH, SLC44A4, ANO1, KIAA1324, MMP7, TSPAN8, ANPEP, TTN, CXCL12, GPX2, SLC2A1, SEMA3C, COL12A1, CEACAM5, NQO1, SLC4A4, CEACAM1, ADAM9, LIFR, SCEL, ANXA2P2, PLAUR, MTMR11, SDC1, KRT19, BTG2, SERPINB5, NUCB2, CTSE, COL1A2, SLPI, GCNT3, FXYD3, C5, CLU, ITGB4, SFN, GPRC5A, UGT1A6, ALB, COMP, COL6A3, ITGB6, FUT3, FGL1, SLC39A5, EGF, MYOF, DPT, FN1, LY75, PLAT, BCAS1, FLRT2, S100A16, S1…	221	2811	18224	2.31749	3.36614e-11	1.68308e-11	2.06646e-10
GOTERM_CC_DIRECT	GO:0005576~extracellular region	54	23.5808	9.4549e-12	NRG4, MMP7, TTN, CXCL12, MMP1, NRCAM, IAPP, RGN, COL12A1, KLK10, FAM150B, COL11A1, COL10A1, MATN3, F8, TCN1, MMP11, INHBA, CTSK, COL1A2, EFNA5, LAMC2, VCAN, COL1A1, CXCL5, C5, COL3A1, CLU, OAS1, LAMB3, COL17A1, CCL20, ALB, FNDC1, COMP, COL6A3, EGF, THBS2, NMU, FN1, PLAT, ADAM28, FBN1, MET, COL5A2, S100A12, LCN2, DKK1, LAMA3, APOL1, LIPH, IGFL2, IGFBP3, PLAU	221	1610	18224	2.76579	1.93825e-09	6.46084e-10	1.18986e-08
GOTERM_CC_DIRECT	GO:0031012~extracellular matrix	20	8.73362	3.56225e-09	PLAT, COL3A1, FBN1, CLU, MMP7, POSTN, COL5A2, MMP1, MMP11, COMP, COL6A3, COL1A2, SLPI, COL12A1, VCAN, COL1A1, ADAMTS12, THBS2, FN1, DPT	221	296	18224	5.57173	7.30262e-07	1.82565e-07	4.48296e-06
GOTERM_CC_DIRECT	GO:0005578~proteinaceous extracellular matrix	19	8.29694	4.57943e-09	CTHRC1, MATN3, FLRT2, FBN1, MMP7, POSTN, COL5A2, MMP1, MMP11, COL17A1, COMP, COL6A3, COL1A2, VCAN, ADAMTS12, COL11A1, FN1, COL10A1, DPT	221	268	18224	5.84615	9.38782e-07	1.87756e-07	5.76304e-06
GOTERM_CC_DIRECT	GO:0005581~collagen trimer	12	5.24017	1.41039e-08	CTHRC1, COL17A1, CD36, COL3A1, COL6A3, COL1A2, COL12A1, COL1A1, COL11A1, COL5A2, MMP1, COL10A1	221	92	18224	10.7559	2.89129e-06	4.81883e-07	1.77492e-05
GOTERM_CC_DIRECT	GO:0005788~endoplasmic reticulum lumen	14	6.11354	6.19797e-07	PDIA2, COL3A1, F8, COL5A2, PLAUR, COL17A1, BACE1, COL6A3, COL1A2, COL12A1, GPX8, COL1A1, COL11A1, COL10A1	221	192	18224	6.01282	0.00012705	1.8151e-05	0.000779989
GOTERM_CC_DIRECT	GO:0009986~cell surface	19	8.29694	0.000107821	PLAT, MET, CLU, MMP7, ITGB4, ITGA2, ITGA3, SDC1, CD36, SULF2, SRPX2, FAP, BACE1, SULF1, MSLN, MST1R, CEACAM1, PLAU, ADAM9	221	542	18224	2.89072	0.0218619	0.00275924	0.135604
GOTERM_CC_DIRECT	GO:0005925~focal adhesion	15	6.55022	0.000298305	NOX4, FLRT2, EFNB2, FERMT1, FHL2, LMO7, ITGA2, ITGA3, PLAUR, TNS4, SDC1, FAP, ITGB6, PLAU, ADAM9	221	391	18224	3.16349	0.0593288	0.0067727	0.374758
GOTERM_CC_DIRECT	GO:0005604~basement membrane	7	3.05677	0.0003858	COL17A1, LAMA3, FREM1, FBN1, EFNA5, THBS2, ANXA2P2	221	79	18224	7.30672	0.0760564	0.00787922	0.484431
GOTERM_CC_DIRECT	GO:0005887~integral component of plasma membrane	32	13.9738	0.00088963	FXYD3, TSPAN1, AQP8, SLC16A12, KIAA1324, ANPEP, TSPAN8, GPRC5A, NRCAM, EDNRA, COL17A1, SLC2A1, CEACAM6, CEACAM5, SLC39A5, SLC4A4, SLC43A1, CEACAM1, LY75, FLRT2, TRHDE, MET, EFNB2, SLC6A14, LIFR, PLAUR, SDC1, CD36, SLC17A4, SLC7A2, BACE1, MST1R	221	1415	18224	1.86485	0.166778	0.01645	1.11382
GOTERM_CC_DIRECT	GO:0071438~invadopodium membrane	3	1.31004	0.00210768	FAP, ITGA3, PLAUR	221	6	18224	41.2308	0.351134	0.0354023	2.62029
GOTERM_CC_DIRECT	GO:0008305~integrin complex	4	1.74672	0.00409906	ITGB6, ITGB4, ITGA2, ITGA3	221	27	18224	12.2165	0.569167	0.0627188	5.0378
GOTERM_CC_DIRECT	GO:0005886~plasma membrane	68	29.6943	0.00416947	NRG4, TSPAN1, SLC44A4, AQP8, ANO1, DPP10, EDNRA, NRCAM, AQP12A, MALL, MCOLN3, PAK3, FAP, SLC2A1, CEACAM6, SLC4A4, SLC43A1, CEACAM1, EFNB2, F8, LIFR, PLAUR, SDC1, STYK1, KRT19, CD36, NUCB2, BACE1, EFNA5, MST1R, FXYD3, CLDN18, IL22RA1, ASAP2, ITGB4, CDH3, GPRC5A, COL17A1, ITGB6, MSLN, AHNAK2, EGF, MYOF, GABRP, ADAM28, FLRT2, S100A16, OSBPL3, MET, SLC6A14, ITGA2, ITGA3, S100A14, GJB2, S100A12, KCNN4…	221	4121	18224	1.36069	0.575366	0.0593467	5.12225
GOTERM_CC_DIRECT	GO:0031093~platelet alpha granule lumen	5	2.18341	0.00435575	ALB, CLU, F8, EGF, FN1	221	55	18224	7.4965	0.591343	0.0579139	5.34536
GOTERM_CC_DIRECT	GO:0009897~external side of plasma membrane	8	3.49345	0.0151034	NRCAM, SDC1, CD36, ITGB6, ITGA2, ITGA3, ANPEP, CXCL12	221	213	18224	3.09715	0.955835	0.177156	17.4298
GOTERM_CC_DIRECT	GO:0005584~collagen type I trimer	2	0.873362	0.0239989	COL1A2, COL1A1	221	2	18224	82.4615	0.993124	0.253924	26.3393
GOTERM_CC_DIRECT	GO:0016324~apical plasma membrane	9	3.93013	0.0253972	NOX4, CD36, SLC17A4, SLC2A1, ANO1, LMO7, PDZK1, CEACAM1, FN1	221	291	18224	2.55036	0.994875	0.253965	27.6564
GOTERM_CC_DIRECT	GO:0005610~laminin-5 complex	2	0.873362	0.0357825	LAMB3, LAMA3	221	3	18224	54.9744	0.99943	0.325073	36.7809
GOTERM_CC_DIRECT	GO:0048471~perinuclear region of cytoplasm	14	6.11354	0.0390264	NOX4, INHBA, S100A6, TSPAN1, MT1M, MLPH, CLU, MT1E, BRSK2, ITGA2, LAMC2, ITGA3, S100A14, MT1G	221	621	18224	1.85904	0.999714	0.335045	39.4059
GOTERM_CC_DIRECT	GO:0005913~cell-cell adherens junction	9	3.93013	0.0428061	S100P, TRIM29, CAPG, S100A11, LMO7, ANLN, SFN, CDH3, GPRC5A	221	323	18224	2.29769	0.999873	0.347586	42.3378
GOTERM_CC_DIRECT	GO:0005793~endoplasmic reticulum-Golgi intermediate compartment	4	1.74672	0.0490825	NUCB2, ANPEP, GJB2, FN1	221	68	18224	4.85068	0.999967	0.374351	46.9194
GOTERM_CC_DIRECT	GO:0030018~Z disc	5	2.18341	0.0548241	KRT19, FHL2, AHNAK2, FBXO32, TTN	221	118	18224	3.49413	0.99999	0.395017	50.8147
GOTERM_CC_DIRECT	GO:0045177~apical part of cell	4	1.74672	0.0622673	PLAT, CD36, AQP8, FAP	221	75	18224	4.39795	0.999998	0.422558	55.4728
GOTERM_CC_DIRECT	GO:0030659~cytoplasmic vesicle membrane	5	2.18341	0.0665035	BACE1, AHNAK2, SFN, GPRC5A, MYOF	221	126	18224	3.27228	0.999999	0.431247	57.939
GOTERM_CC_DIRECT	GO:0016323~basolateral plasma membrane	6	2.62009	0.0674698	SLC2A1, ITGA3, CEACAM5, SLC39A5, SLC4A4, ADAM9	221	180	18224	2.74872	0.999999	0.423494	58.4837
GOTERM_CC_DIRECT	GO:0043235~receptor complex	5	2.18341	0.0680476	ITGB6, LIFR, ITGB4, ITGA3, EGF	221	127	18224	3.24652	0.999999	0.414376	58.8063
GOTERM_CC_DIRECT	GO:0042383~sarcolemma	4	1.74672	0.083613	KRT19, KCNJ8, COL6A3, AHNAK2	221	85	18224	3.88054	1	0.472328	66.6744
GOTERM_CC_DIRECT	GO:0016021~integral component of membrane	73	31.8777	0.0850163	NRG4, SLC44A4, AQP8, SLC16A12, ANO1, DPP10, KIAA1324, LMO7, BNIP3, ANPEP, SIDT2, NRCAM, AQP12A, MALL, MCOLN3, FAP, SLC2A1, GPX8, NQO1, SLC4A4, SLC43A1, CEACAM1, ADAM9, F8, LIFR, PLAUR, STYK1, CD36, BACE1, EFNA5, COL1A1, MST1R, FXYD3, CLDN18, GCNT3, IL22RA1, GALNT5, CDH3, GPRC5A, TMED6, UGT1A6, COL17A1, DPCR1, FUT3, SDR16C5, SLC39A5, SLC25A45, EGF, MYOF, ACSL5, GABRP, ADAM28, NOX4, LY75, TMC7, FLR…	221	5163	18224	1.16593	1	0.46638	67.311
GOTERM_CC_DIRECT	GO:0030056~hemidesmosome	2	0.873362	0.0926095	COL17A1, ITGB4	221	8	18224	20.6154	1	0.485253	70.5656
GOTERM_CC_DIRECT	GO:0001726~ruffle	4	1.74672	0.0953095	S100A6, PTK6, S100A11, FGD6	221	90	18224	3.66496	1	0.484369	71.649

## Sheet: GO-MF
Category	Term	Count	%	PValue	Genes	List Total	Pop Hits	Pop Total	Fold Enrichment	Bonferroni	Benjamini	FDR
GOTERM_MF_DIRECT	GO:0005509~calcium ion binding	27	11.7904	6.83013e-07	S100A6, TTN, CDH3, MMP1, COMP, RGN, EGF, THBS2, MATN3, S100A16, GUCA1C, S100P, CAPN8, FBN1, S100A11, S100A10, S100A14, MMP11, ANXA2P2, S100A12, ANXA10, SULF2, SULF1, NUCB2, SYTL2, VCAN, CDH11	207	717	16881	3.07095	0.000288873	0.000288873	0.000960415
GOTERM_MF_DIRECT	GO:0005201~extracellular matrix structural constituent	9	3.93013	1.51041e-06	MATN3, COMP, COL3A1, FBN1, COL1A2, VCAN, COL1A1, COL11A1, COL5A2	207	67	16881	10.9546	0.000638698	0.0003194	0.00212384
GOTERM_MF_DIRECT	GO:0005178~integrin binding	9	3.93013	4.34674e-05	FAP, COL3A1, ITGB6, FBN1, ITGA2, TSPAN8, ITGA3, FN1, ADAM9	207	105	16881	6.99006	0.0182191	0.00611029	0.0611043
GOTERM_MF_DIRECT	GO:0002020~protease binding	8	3.49345	0.000237461	LCN2, FAP, COMP, CST2, CST1, ITGA3, TTN, FN1	207	101	16881	6.45946	0.0955769	0.0248017	0.333389
GOTERM_MF_DIRECT	GO:0004252~serine-type endopeptidase activity	12	5.24017	0.000306517	PLAT, CTSK, FAP, F8, MMP7, RHBDL2, KLK10, KLK1, PLAU, MMP1, MMP11, TMPRSS4	207	255	16881	3.83768	0.121621	0.0256019	0.430147
GOTERM_MF_DIRECT	GO:0005518~collagen binding	6	2.62009	0.00081661	CTSK, COMP, ITGA2, ITGA3, FN1, ADAM9	207	60	16881	8.15507	0.292181	0.0559673	1.14217
GOTERM_MF_DIRECT	GO:0004222~metalloendopeptidase activity	7	3.05677	0.00262943	ADAM28, FAP, MMP7, ADAMTS12, MMP1, MMP11, ADAM9	207	113	16881	5.05181	0.671662	0.14709	3.63454
GOTERM_MF_DIRECT	GO:0008201~heparin binding	8	3.49345	0.0035267	COMP, FBN1, MMP7, LIPH, POSTN, LAMC2, THBS2, FN1	207	160	16881	4.07754	0.775624	0.170394	4.84646
GOTERM_MF_DIRECT	GO:0005102~receptor binding	12	5.24017	0.00415241	PLAT, NRG4, STYK1, LAMA3, SRPX2, IAPP, PTK6, C5, EPHX2, CXCL12, NMU, PLAUR	207	353	16881	2.77226	0.827977	0.177634	5.68319
GOTERM_MF_DIRECT	GO:0048407~platelet-derived growth factor binding	3	1.31004	0.00758082	COL3A1, COL1A2, COL1A1	207	11	16881	22.2411	0.960001	0.275222	10.1478
GOTERM_MF_DIRECT	GO:0008009~chemokine activity	4	1.74672	0.0218707	CXCL5, CCL20, C5, CXCL12	207	49	16881	6.6572	0.999913	0.572739	26.7247
GOTERM_MF_DIRECT	GO:0004713~protein tyrosine kinase activity	6	2.62009	0.0236193	NRG4, PTK6, MET, MST1R, EGF, TTN	207	133	16881	3.67898	0.999959	0.569397	28.5454
GOTERM_MF_DIRECT	GO:0008449~N-acetylglucosamine-6-sulfatase activity	2	0.873362	0.0361664	SULF2, SULF1	207	3	16881	54.3671	1	0.698386	40.4276
GOTERM_MF_DIRECT	GO:0043236~laminin binding	3	1.31004	0.0369863	ITGA2, ITGA3, ADAM9	207	25	16881	9.78609	1	0.679766	41.1362
GOTERM_MF_DIRECT	GO:0001968~fibronectin binding	3	1.31004	0.039753	CTSK, ITGA3, IGFBP3	207	26	16881	9.4097	1	0.681434	43.4701
GOTERM_MF_DIRECT	GO:0042802~identical protein binding	16	6.9869	0.0413858	CLDN18, FHL2, BNIP3, SFN, TTN, INHBA, SRPX2, ALB, IAPP, PTK6, SLC2A1, COL1A2, CEACAM5, COL1A1, NQO1, FN1	207	749	16881	1.74207	1	0.672878	44.8069
GOTERM_MF_DIRECT	GO:0045499~chemorepellent activity	3	1.31004	0.0425955	FLRT2, SEMA3C, EFNA5	207	27	16881	9.06119	1	0.66146	45.7782
GOTERM_MF_DIRECT	GO:0031545~peptidyl-proline 4-dioxygenase activity	2	0.873362	0.0479302	PDIA2, EGLN3	207	4	16881	40.7754	1	0.684705	49.8754
GOTERM_MF_DIRECT	GO:0008270~zinc ion binding	22	9.60699	0.0484312	S100A6, TRHDE, MT1M, LMO3, TRIM29, MMP7, FHL2, ADH1B, LMO7, OAS1, ANPEP, SCEL, MMP1, MMP11, S100A12, TRIM31, MT1E, RGN, ADAMTS12, NR5A2, LONRF2, MT1G	207	1169	16881	1.53474	1	0.668861	50.245
GOTERM_MF_DIRECT	GO:0008083~growth factor activity	6	2.62009	0.0486583	INHBA, NRG4, DKK1, TFF1, EGF, CXCL12	207	162	16881	3.0204	1	0.651809	50.4117
GOTERM_MF_DIRECT	GO:0001618~virus receptor activity	4	1.74672	0.0540652	EFNB2, ITGB6, ITGA2, ANPEP	207	70	16881	4.66004	1	0.673581	54.2309
GOTERM_MF_DIRECT	GO:0030297~transmembrane receptor protein tyrosine kinase activator activity	2	0.873362	0.0710309	EFNA5, EGF	207	6	16881	27.1836	1	0.757478	64.5146
GOTERM_MF_DIRECT	GO:0005515~protein binding	119	51.9651	0.0740325	S100A6, TSPAN1, LMO3, POSTN, TTN, NRCAM, MALL, FAP, SLC2A1, FAM150B, SLC4A4, NQO1, ADAM9, COL10A1, MATN3, EFNB2, F8, LIFR, CST2, CST1, SCEL, PLAUR, TNS4, TNFAIP6, KRT19, CD36, TRIM31, BACE1, COL1A2, COL1A1, MST1R, IL22RA1, CLU, ASAP2, BEX1, ITGB4, OAS1, IGF2BP3, LAMB3, ALB, PTK6, ITGB6, MSLN, AHNAK2, TFF1, GNMT, EGF, RUNX2, FN1, PLAT, OSBPL3, S100P, S100A16, MET, S100A11, S100A10, ITGA2, ITGA3, S…	207	8785	16881	1.10467	1	0.756975	66.0933
GOTERM_MF_DIRECT	GO:0008237~metallopeptidase activity	4	1.74672	0.0766088	ADAM28, TRHDE, ANPEP, ADAM9	207	81	16881	4.0272	1	0.754572	67.396
GOTERM_MF_DIRECT	GO:0042379~chemokine receptor binding	2	0.873362	0.0935737	CXCL12, S100A14	207	8	16881	20.3877	1	0.810301	74.8794
GOTERM_MF_DIRECT	GO:0046332~SMAD binding	3	1.31004	0.096686	COL3A1, COL1A2, COL5A2	207	43	16881	5.68959	1	0.808781	76.0654
GOTERM_MF_DIRECT	GO:0009055~electron carrier activity	4	1.74672	0.0976265	NOX4, GPX2, AOX1, ACADL	207	90	16881	3.62448	1	0.799989	76.4134
GOTERM_MF_DIRECT	GO:0016491~oxidoreductase activity	6	2.62009	0.097851	NOX4, ADHFE1, AOX1, F8, EGLN3, ADH1B	207	200	16881	2.44652	1	0.788951	76.4958

## Sheet: KEGG
Category	Term	Count	%	PValue	Genes	List Total	Pop Hits	Pop Total	Fold Enrichment	Bonferroni	Benjamini	FDR
KEGG_PATHWAY	hsa04512:ECM-receptor interaction	18	7.86026	3.04238e-15	COL3A1, ITGB4, ITGA2, ITGA3, COL5A2, LAMB3, SDC1, CD36, LAMA3, COMP, COL6A3, ITGB6, COL1A2, LAMC2, COL1A1, THBS2, COL11A1, FN1	101	87	6879	14.0915	4.43645e-13	4.43645e-13	3.57492e-12
KEGG_PATHWAY	hsa04510:Focal adhesion	19	8.29694	6.30145e-10	COL3A1, MET, ITGB4, ITGA2, ITGA3, COL5A2, LAMB3, LAMA3, PAK3, COMP, COL6A3, ITGB6, COL1A2, LAMC2, COL1A1, EGF, THBS2, COL11A1, FN1	101	206	6879	6.28189	9.32614e-08	4.66307e-08	7.50749e-07
KEGG_PATHWAY	hsa04151:PI3K-Akt signaling pathway	19	8.29694	1.82428e-06	COL3A1, MET, ITGB4, ITGA2, ITGA3, COL5A2, LAMB3, LAMA3, COMP, COL6A3, ITGB6, COL1A2, LAMC2, EFNA5, COL1A1, EGF, THBS2, COL11A1, FN1	101	345	6879	3.75093	0.000269957	8.99938e-05	0.00217341
KEGG_PATHWAY	hsa04974:Protein digestion and absorption	10	4.36681	4.45611e-06	KCNN4, COL17A1, COL3A1, COL6A3, COL1A2, COL12A1, COL1A1, COL11A1, COL5A2, COL10A1	101	88	6879	7.73965	0.000659288	0.000164863	0.00530885
KEGG_PATHWAY	hsa05146:Amoebiasis	9	3.93013	0.000140415	LAMB3, LAMA3, COL3A1, COL1A2, LAMC2, COL1A1, COL11A1, COL5A2, FN1	101	106	6879	5.78283	0.0205684	0.00414795	0.167161
KEGG_PATHWAY	hsa05144:Malaria	5	2.18341	0.00539817	SDC1, CD36, COMP, MET, THBS2	101	49	6879	6.94989	0.551162	0.124986	6.24523
KEGG_PATHWAY	hsa05222:Small cell lung cancer	6	2.62009	0.00769305	LAMB3, LAMA3, ITGA2, LAMC2, ITGA3, FN1	101	85	6879	4.80769	0.68113	0.150648	8.79028
KEGG_PATHWAY	hsa05200:Pathways in cancer	13	5.67686	0.0111965	EDNRA, LAMB3, LAMA3, SLC2A1, MET, EGLN3, ITGA2, LAMC2, ITGA3, EGF, CXCL12, MMP1, FN1	101	393	6879	2.25297	0.81108	0.18804	12.5538
KEGG_PATHWAY	hsa04610:Complement and coagulation cascades	5	2.18341	0.0176781	PLAT, C5, F8, PLAU, PLAUR	101	69	6879	4.93543	0.928622	0.254207	19.1439
KEGG_PATHWAY	hsa05410:Hypertrophic cardiomyopathy (HCM)	5	2.18341	0.026438	ITGB6, ITGB4, ITGA2, ITGA3, TTN	101	78	6879	4.36596	0.981041	0.327361	27.3283
KEGG_PATHWAY	hsa05414:Dilated cardiomyopathy	5	2.18341	0.0335015	ITGB6, ITGB4, ITGA2, ITGA3, TTN	101	84	6879	4.0541	0.993547	0.36775	33.3672
KEGG_PATHWAY	hsa04360:Axon guidance	6	2.62009	0.0371299	PAK3, EFNB2, MET, SEMA3C, EFNA5, CXCL12	101	127	6879	3.21774	0.996302	0.372903	36.2872
KEGG_PATHWAY	hsa05323:Rheumatoid arthritis	5	2.18341	0.0387674	CTSK, CXCL5, CCL20, CXCL12, MMP1	101	88	6879	3.86982	0.997125	0.362458	37.5662
KEGG_PATHWAY	hsa04611:Platelet activation	6	2.62009	0.0404248	COL3A1, COL1A2, ITGA2, COL1A1, COL11A1, COL5A2	101	130	6879	3.14349	0.997773	0.353528	38.8367
KEGG_PATHWAY	hsa00830:Retinol metabolism	4	1.74672	0.0657465	UGT1A6, AOX1, ADH1B, SDR16C5	101	64	6879	4.25681	0.999957	0.488807	55.5247
KEGG_PATHWAY	hsa05211:Renal cell carcinoma	4	1.74672	0.0707516	PAK3, SLC2A1, MET, EGLN3	101	66	6879	4.12781	0.999981	0.492753	58.2819
KEGG_PATHWAY	hsa03320:PPAR signaling pathway	4	1.74672	0.0733171	CD36, ACADL, MMP1, ACSL5	101	67	6879	4.0662	0.999987	0.484645	59.6336
KEGG_PATHWAY	hsa05412:Arrhythmogenic right ventricular cardiomyopathy (ARVC)	4	1.74672	0.0733171	ITGB6, ITGB4, ITGA2, ITGA3	101	67	6879	4.0662	0.999987	0.484645	59.6336
KEGG_PATHWAY	hsa04810:Regulation of actin cytoskeleton	7	3.05677	0.0846774	PAK3, ITGB6, ITGB4, ITGA2, ITGA3, EGF, FN1	101	210	6879	2.2703	0.999998	0.516881	65.1504
