# Supplementary material for: Identification of a Nine-Gene Signature and Establishment of a Prognostic Nomogram Predicting Overall Survival of Pancreatic Cancer
Source: Front Oncol. 2019 Sep 27;9:996. doi: 10.3389/fonc.2019.00996 (PMC6776930; doi:10.3389/fonc.2019.00996)
Supplement: Supplementary Table 5 — The reasons for each case excluded from univariate- and multivariate Cox regression analyses. [file Table_5.XLSX]

## Sheet: sheet1
Supplementary table 5. The reasons for each case excluded from univariate- and multivariate Cox regression analyses
Case_ID	Sample_ID	Size	Site	Subtype	Grade	T	N	M	AJCC stage	Residual tumor	History of chemotherapy	History of radiation therapy	History of targeted molecular therapy	Tobacco smoking history	Alcohol drinking history	History of chronic pancreatitis	History of diabetes	History of Prior Malignancy
TCGA-3A-A9IS	TCGA-3A-A9IS-01												NA
TCGA-3A-A9IL	TCGA-3A-A9IL-01						NA
TCGA-HZ-8637	TCGA-HZ-8637-01													NA		NA	NA
TCGA-HZ-A77P	TCGA-HZ-A77P-01											NA
TCGA-XD-AAUI	TCGA-XD-AAUI-01															NA
TCGA-HZ-7918	TCGA-HZ-7918-01													NA		NA	NA
TCGA-HZ-7920	TCGA-HZ-7920-01													NA		NA	NA
TCGA-FB-A4P5	TCGA-FB-A4P5-01											NA
TCGA-HV-A7OP	TCGA-HV-A7OP-01				NA
TCGA-3A-A9IN	TCGA-3A-A9IN-01						NA
TCGA-PZ-A5RE	TCGA-PZ-A5RE-01									NA					NA	NA	NA
TCGA-3A-A9IO	TCGA-3A-A9IO-01					NA	NA		NA
TCGA-HZ-A4BK	TCGA-HZ-A4BK-01													NA		NA	NA
TCGA-2J-AAB6	TCGA-2J-AAB6-01													NA
TCGA-US-A77J	TCGA-US-A77J-01											NA	NA
TCGA-2L-AAQM	TCGA-2L-AAQM-01																NA
TCGA-HZ-A49I	TCGA-HZ-A49I-01													NA		NA	NA
TCGA-HZ-8519	TCGA-HZ-8519-01													NA		NA	NA
TCGA-FB-A78T	TCGA-FB-A78T-01											NA				NA
TCGA-HZ-8002	TCGA-HZ-8002-01											NA		NA	NA	NA	NA
TCGA-3E-AAAZ	TCGA-3E-AAAZ-01									NA		NA			NA	NA	NA
TCGA-HV-A5A4	TCGA-HV-A5A4-01	NA								NA
TCGA-FB-A4P6	TCGA-FB-A4P6-01									NA
TCGA-IB-A5ST	TCGA-IB-A5ST-01											NA
TCGA-HZ-7919	TCGA-HZ-7919-01											NA	NA	NA		NA	NA
TCGA-HZ-8003	TCGA-HZ-8003-01											NA		NA	NA	NA	NA
TCGA-HV-AA8V	TCGA-HV-AA8V-01	NA
TCGA-HZ-7923	TCGA-HZ-7923-01											NA		NA	NA	NA	NA
TCGA-HZ-8001	TCGA-HZ-8001-01											NA		NA	NA	NA	NA
TCGA-HZ-8317	TCGA-HZ-8317-01													NA		NA	NA
TCGA-HZ-A9TJ	TCGA-HZ-A9TJ-01													NA		NA	NA
TCGA-2L-AAQL	TCGA-2L-AAQL-01									NA
TCGA-Q3-A5QY	TCGA-Q3-A5QY-01												NA
TCGA-HZ-A49G	TCGA-HZ-A49G-01													NA		NA	NA
TCGA-HV-A5A5	TCGA-HV-A5A5-01	NA								NA
TCGA-F2-6880	TCGA-F2-6880-01												NA
TCGA-IB-A7M4	TCGA-IB-A7M4-01	NA
TCGA-HZ-8636	TCGA-HZ-8636-01											NA		NA		NA	NA
TCGA-2J-AABT	TCGA-2J-AABT-01											NA
TCGA-HZ-7926	TCGA-HZ-7926-01									NA		NA	NA	NA		NA	NA
TCGA-2L-AAQI	TCGA-2L-AAQI-01																NA
TCGA-FB-A545	TCGA-FB-A545-01	NA								NA						NA
TCGA-2J-AABK	TCGA-2J-AABK-01													NA
TCGA-2J-AAB8	TCGA-2J-AAB8-01											NA		NA
TCGA-HZ-7924	TCGA-HZ-7924-01											NA		NA		NA	NA
TCGA-HZ-A49H	TCGA-HZ-A49H-01											NA		NA		NA	NA
TCGA-HZ-8315	TCGA-HZ-8315-01											NA		NA	NA	NA	NA
TCGA-HV-AA8X	TCGA-HV-AA8X-01	NA
TCGA-HZ-A77O	TCGA-HZ-A77O-01											NA
TCGA-HV-A7OL	TCGA-HV-A7OL-01	NA
TCGA-IB-7888	TCGA-IB-7888-01													NA
TCGA-HZ-7925	TCGA-HZ-7925-01											NA		NA		NA	NA
TCGA-HV-A5A6	TCGA-HV-A5A6-01	NA													NA
TCGA-Z5-AAPL	TCGA-Z5-AAPL-01	NA													NA	NA	NA
TCGA-US-A779	TCGA-US-A779-01											NA	NA
TCGA-HZ-A4BH	TCGA-HZ-A4BH-01											NA	NA	NA		NA	NA
TCGA-FB-AAPS	TCGA-FB-AAPS-01												NA
TCGA-3A-A9I7	TCGA-3A-A9I7-01	NA											NA	NA
TCGA-IB-8126	TCGA-IB-8126-01											NA	NA
TCGA-3A-A9I5	TCGA-3A-A9I5-01					NA			NA					NA
TCGA-3E-AAAY	TCGA-3E-AAAY-01									NA
TCGA-HZ-7289	TCGA-HZ-7289-01									NA				NA		NA	NA
TCGA-FB-AAPY	TCGA-FB-AAPY-01															NA
TCGA-IB-8127	TCGA-IB-8127-01														NA
TCGA-IB-7645	TCGA-IB-7645-01														NA
TCGA-FB-A5VM	TCGA-FB-A5VM-01											NA
TCGA-LB-A8F3	TCGA-LB-A8F3-01															NA
TCGA-HV-A5A3	TCGA-HV-A5A3-01	NA					NA			NA				NA
TCGA-Q3-AA2A	TCGA-Q3-AA2A-01	NA								NA						NA
TCGA-H6-A45N	TCGA-H6-A45N-01									NA		NA
TCGA-HZ-A77Q	TCGA-HZ-A77Q-01											NA	NA
TCGA-XD-AAUG	TCGA-XD-AAUG-01															NA	NA
TCGA-HZ-8005	TCGA-HZ-8005-01													NA	NA	NA	NA
TCGA-2J-AABR	TCGA-2J-AABR-01													NA
