# Supplementary material for: Identification of a Nine-Gene Signature and Establishment of a Prognostic Nomogram Predicting Overall Survival of Pancreatic Cancer
Source: Front Oncol. 2019 Sep 27;9:996. doi: 10.3389/fonc.2019.00996 (PMC6776930; doi:10.3389/fonc.2019.00996)
Supplement: Supplementary Table 6 — Gene set enrichment analyses between high and low risk group in 165 TCGA PAAD Samples. [file Table_6.XLSX]

## Sheet: high risk
Supplementary Table 6. Gene set enrichment analyses between high and low risk group in 165 TCGA PAAD Samples
Terms enriched in high risk group
NAME	SIZE	ES	NES	NOM p-val	FDR q-val
C2 KEGG (16 terms)
KEGG_OOCYTE_MEIOSIS	111	0.529401	1.82021	0	0.215061
KEGG_REGULATION_OF_ACTIN_CYTOSKELETON	212	0.469696	1.81255	0	0.172054
KEGG_UBIQUITIN_MEDIATED_PROTEOLYSIS	133	0.568227	1.80987	0.00190114	0.140909
KEGG_THYROID_CANCER	29	0.582408	1.80348	0.00819672	0.123589
KEGG_AXON_GUIDANCE	128	0.463979	1.79455	0	0.115546
KEGG_FOCAL_ADHESION	199	0.509981	1.77625	0.004329	0.122442
KEGG_N_GLYCAN_BIOSYNTHESIS	46	0.575105	1.76973	0.00804829	0.115823
KEGG_PANCREATIC_CANCER	70	0.553119	1.75717	0.00407332	0.117311
KEGG_GALACTOSE_METABOLISM	26	0.552701	1.75135	0.0164706	0.112448
KEGG_PATHOGENIC_ESCHERICHIA_COLI_INFECTION	55	0.552831	1.75071	0.0162933	0.104009
KEGG_PROGESTERONE_MEDIATED_OOCYTE_MATURATION	85	0.499101	1.73788	0.0040404	0.107343
KEGG_SPLICEOSOME	124	0.595489	1.7128	0.00787402	0.12739
KEGG_ECM_RECEPTOR_INTERACTION	84	0.536429	1.70617	0.0268456	0.12682
KEGG_PATHWAYS_IN_CANCER	324	0.447511	1.70551	0.00431965	0.119534
KEGG_PYRIMIDINE_METABOLISM	96	0.500179	1.70308	0.0141988	0.115305
KEGG_TIGHT_JUNCTION	130	0.446727	1.69943	0.00229358	0.112556
KEGG_DNA_REPLICATION	36	0.6757	1.69273	0.0400802	0.111704
KEGG_BASAL_TRANSCRIPTION_FACTORS	35	0.587454	1.69137	0.0134875	0.107865
KEGG_P53_SIGNALING_PATHWAY	67	0.504379	1.68597	0.0163934	0.107881
KEGG_GLYCOSPHINGOLIPID_BIOSYNTHESIS_LACTO_AND_NEOLACTO_SERIES	25	0.520187	1.6856	0.00697674	0.103605
KEGG_RNA_DEGRADATION	57	0.567338	1.67681	0.0138614	0.10742
KEGG_ONE_CARBON_POOL_BY_FOLATE	17	0.609724	1.67379	0.021645	0.105615
KEGG_MELANOMA	71	0.4523	1.66781	0.00900901	0.105856
KEGG_NOTCH_SIGNALING_PATHWAY	47	0.506664	1.65372	0.0125261	0.113502
KEGG_COLORECTAL_CANCER	62	0.511956	1.64974	0.00994036	0.112564
KEGG_ARRHYTHMOGENIC_RIGHT_VENTRICULAR_CARDIOMYOPATHY_ARVC	74	0.45112	1.64785	0.0194175	0.11058
KEGG_GLYCOLYSIS_GLUCONEOGENESIS	61	0.471913	1.64725	0.0125628	0.107064
KEGG_MISMATCH_REPAIR	23	0.666939	1.64684	0.030426	0.10376
KEGG_ENDOMETRIAL_CANCER	52	0.515763	1.64411	0.0240481	0.10229
KEGG_NUCLEOTIDE_EXCISION_REPAIR	44	0.591629	1.64236	0.0217391	0.100272
KEGG_NEUROTROPHIN_SIGNALING_PATHWAY	126	0.467774	1.64043	0.0155642	0.0980995
KEGG_SMALL_CELL_LUNG_CANCER	84	0.506616	1.63601	0.0222222	0.098167
KEGG_GLYCOSAMINOGLYCAN_BIOSYNTHESIS_KERATAN_SULFATE	14	0.592924	1.63317	0.026971	0.0971791
KEGG_VEGF_SIGNALING_PATHWAY	75	0.419785	1.62805	0.00444444	0.0982542
C5
Biological process (550 terms)
GO_CELL_DIVISION	449	0.625665	2.10389	0	0.1373
GO_NUCLEAR_CHROMOSOME_SEGREGATION	216	0.662425	2.08113	0	0.108204
GO_ORGANELLE_FISSION	471	0.597818	2.05479	0	0.118028
GO_NEGATIVE_REGULATION_OF_MITOTIC_NUCLEAR_DIVISION	32	0.725029	2.03961	0	0.115413
GO_REGULATION_OF_NUCLEAR_DIVISION	159	0.579898	2.03868	0	0.0932547
GO_SISTER_CHROMATID_COHESION	107	0.716562	2.03716	0	0.0789052
GO_CHROMOSOME_LOCALIZATION	59	0.702222	2.03049	0	0.0754155
GO_CHROMOSOME_SEGREGATION	259	0.644206	2.02364	0	0.0709467
GO_POSITIVE_REGULATION_OF_DNA_REPLICATION	86	0.579093	2.02064	0	0.0667876
GO_MEIOTIC_CELL_CYCLE	176	0.534379	2.0147	0	0.067013
GO_SISTER_CHROMATID_SEGREGATION	169	0.704709	2.01384	0	0.0622721
GO_MITOTIC_NUCLEAR_DIVISION	349	0.642238	2.01167	0	0.0578453
GO_REGULATION_OF_PROTEIN_COMPLEX_DISASSEMBLY	208	0.573675	2.00857	0	0.0559084
GO_CELL_CYCLE_PROCESS	1031	0.575347	2.00604	0	0.0528479
GO_CELL_CYCLE	1260	0.562635	2.00161	0	0.052684
GO_REGULATION_OF_CELL_DIVISION	265	0.518358	1.98334	0	0.0689536
GO_REGULATION_OF_MITOTIC_CELL_CYCLE	453	0.56005	1.98002	0	0.068965
GO_REGULATION_OF_CHROMOSOME_SEGREGATION	82	0.694711	1.97967	0	0.0657463
GO_REGULATION_OF_MICROTUBULE_POLYMERIZATION_OR_DEPOLYMERIZATION	170	0.588435	1.97963	0	0.062286
GO_MITOTIC_CELL_CYCLE	738	0.6056	1.97734	0	0.0611263
GO_CYTOKINESIS	84	0.626656	1.96739	0	0.0662942
GO_REGULATION_OF_SUBSTRATE_ADHESION_DEPENDENT_CELL_SPREADING	42	0.596783	1.96599	0	0.0653302
GO_REGULATION_OF_CELL_CYCLE_PROCESS	542	0.539059	1.96195	0	0.0675105
GO_NEGATIVE_REGULATION_OF_CELL_DIVISION	58	0.640465	1.96125	0	0.0658057
GO_NEURAL_TUBE_FORMATION	94	0.567343	1.95505	0	0.0686905
GO_REGULATION_OF_MICROTUBULE_BASED_PROCESS	232	0.565579	1.95435	0	0.0665934
GO_MEIOTIC_CELL_CYCLE_PROCESS	143	0.530164	1.95421	0	0.0641269
GO_NEGATIVE_REGULATION_OF_PROTEIN_COMPLEX_DISASSEMBLY	163	0.564055	1.95158	0	0.0638386
GO_NEGATIVE_REGULATION_OF_NUCLEAR_DIVISION	44	0.648944	1.94575	0	0.0666757
GO_LUNG_EPITHELIUM_DEVELOPMENT	34	0.595139	1.94445	0.00221239	0.0656664
GO_REGULATION_OF_SIGNAL_TRANSDUCTION_BY_P53_CLASS_MEDIATOR	160	0.58136	1.94294	0	0.0645832
GO_MITOTIC_SISTER_CHROMATID_SEGREGATION	87	0.719786	1.94272	0	0.0627015
GO_PROTEIN_UBIQUITINATION_INVOLVED_IN_UBIQUITIN_DEPENDENT_PROTEIN_CATABOLIC_PROCESS	130	0.596568	1.94222	0	0.0613373
GO_CHROMOSOME_CONDENSATION	29	0.717462	1.93896	0.00198413	0.0628286
GO_REGULATION_OF_CELL_CYCLE_PHASE_TRANSITION	314	0.568958	1.93728	0	0.0625415
GO_CELL_CYCLE_CHECKPOINT	185	0.609077	1.93727	0	0.0609058
GO_METAPHASE_PLATE_CONGRESSION	40	0.746995	1.9372	0	0.0593127
GO_POSITIVE_REGULATION_OF_CELL_CYCLE_PROCESS	240	0.516068	1.93404	0	0.0592795
GO_REGULATION_OF_DNA_REPLICATION	157	0.558812	1.92897	0	0.0615559
GO_REGULATION_OF_EXIT_FROM_MITOSIS	15	0.740453	1.92419	0	0.0638695
GO_CELL_CYCLE_PHASE_TRANSITION	249	0.58448	1.92094	0	0.0654703
GO_MITOTIC_SPINDLE_ORGANIZATION	67	0.654846	1.92081	0	0.0640779
GO_REGULATION_OF_ERBB_SIGNALING_PATHWAY	79	0.561969	1.92015	0	0.063096
GO_REGULATION_OF_DNA_REPAIR	72	0.604557	1.91842	0	0.0634639
GO_KINETOCHORE_ORGANIZATION	11	0.847592	1.91613	0	0.063823
GO_POSITIVE_REGULATION_OF_DNA_METABOLIC_PROCESS	182	0.528634	1.9156	0	0.0628636
GO_SPINDLE_LOCALIZATION	37	0.66833	1.91188	0	0.0641624
GO_DEVELOPMENTAL_GROWTH_INVOLVED_IN_MORPHOGENESIS	103	0.512551	1.91026	0	0.0639888
GO_CYTOSKELETON_DEPENDENT_CYTOKINESIS	39	0.690902	1.90961	0	0.0633578
GO_POSITIVE_REGULATION_OF_CELL_CYCLE_PHASE_TRANSITION	67	0.609178	1.90682	0	0.0642848
GO_CHROMOSOME_ORGANIZATION	970	0.532194	1.90597	0	0.0637732
GO_DNA_METABOLIC_PROCESS	717	0.537195	1.9059	0	0.0626117
GO_ATP_DEPENDENT_CHROMATIN_REMODELING	72	0.605705	1.90475	0	0.0625259
GO_DNA_INTEGRITY_CHECKPOINT	140	0.594224	1.90451	0	0.061631
GO_REGULATION_OF_PROTEIN_INSERTION_INTO_MITOCHONDRIAL_MEMBRANE_INVOLVED_IN_APOPTOTIC_SIGNALING_PATHWAY	29	0.684411	1.90019	0.00205339	0.0638296
GO_MEMBRANE_BUDDING	112	0.570657	1.8989	0	0.0636262
GO_G2_DNA_DAMAGE_CHECKPOINT	33	0.675098	1.89495	0	0.0656475
GO_REGULATION_OF_RNA_STABILITY	137	0.587578	1.89393	0.0039604	0.0654313
GO_POSITIVE_REGULATION_OF_MITOTIC_CELL_CYCLE	122	0.544798	1.89012	0	0.0673522
GO_REGULATION_OF_CENTROSOME_CYCLE	38	0.682601	1.88775	0	0.06775
GO_POSTTRANSCRIPTIONAL_REGULATION_OF_GENE_EXPRESSION	431	0.527124	1.88556	0	0.0682638
GO_REGULATION_OF_SPINDLE_ORGANIZATION	19	0.774377	1.8835	0	0.0692395
GO_REGULATION_OF_CELL_CYCLE	916	0.49426	1.8828	0	0.0687985
GO_MAINTENANCE_OF_LOCATION_IN_CELL	94	0.521872	1.8827	0	0.0677569
GO_NUCLEUS_ORGANIZATION	131	0.588989	1.88221	0	0.0670792
GO_REGULATION_OF_RESPONSE_TO_DNA_DAMAGE_STIMULUS	140	0.550439	1.88094	0	0.067365
GO_DNA_REPAIR	454	0.561209	1.87944	0	0.0675992
GO_SPINDLE_CHECKPOINT	24	0.749866	1.87902	0	0.0669528
GO_POSITIVE_REGULATION_OF_CYTOKINESIS	35	0.578184	1.87764	0.00444444	0.0669448
GO_MICROTUBULE_CYTOSKELETON_ORGANIZATION	324	0.52413	1.87744	0	0.0661156
GO_GENE_SILENCING_BY_RNA	132	0.539603	1.87727	0	0.0653075
GO_DNA_CONFORMATION_CHANGE	263	0.549788	1.87585	0.0021645	0.0655367
GO_CELL_ADHESION_MEDIATED_BY_INTEGRIN	12	0.782061	1.87479	0	0.0653829
GO_CELL_SEPARATION_AFTER_CYTOKINESIS	17	0.768735	1.87393	0.00199203	0.0653197
GO_NEGATIVE_REGULATION_OF_CELL_CYCLE_PROCESS	206	0.548948	1.87332	0	0.0648018
GO_POSITIVE_REGULATION_OF_CELL_CYCLE	321	0.486321	1.87313	0	0.0641422
GO_REGULATION_OF_SISTER_CHROMATID_SEGREGATION	65	0.662761	1.87259	0	0.063698
GO_ESTABLISHMENT_OR_MAINTENANCE_OF_BIPOLAR_CELL_POLARITY	35	0.554503	1.87248	0	0.0629996
GO_HISTONE_EXCHANGE	51	0.632224	1.87137	0	0.0630181
GO_REGULATION_OF_PROTEIN_UBIQUITINATION_INVOLVED_IN_UBIQUITIN_DEPENDENT_PROTEIN_CATABOLIC_PROCESS	102	0.616474	1.86989	0	0.0631063
GO_MITOTIC_CELL_CYCLE_CHECKPOINT	133	0.592695	1.86953	0	0.062888
GO_POSITIVE_REGULATION_OF_CELLULAR_PROTEIN_CATABOLIC_PROCESS	189	0.550815	1.86633	0	0.0644714
GO_REGULATION_OF_CYTOKINESIS	63	0.566555	1.86484	0	0.0646259
GO_POSITIVE_REGULATION_OF_MITOCHONDRIAL_OUTER_MEMBRANE_PERMEABILIZATION_INVOLVED_IN_APOPTOTIC_SIGNALING_PATHWAY	36	0.64642	1.86452	0	0.0640628
GO_REGULATION_OF_CELL_CYCLE_G2_M_PHASE_TRANSITION	58	0.580008	1.86315	0.00215517	0.064316
GO_CELLULAR_RESPONSE_TO_DNA_DAMAGE_STIMULUS	683	0.533579	1.86111	0	0.0649324
GO_NEGATIVE_REGULATION_OF_MITOTIC_CELL_CYCLE	188	0.556898	1.86092	0	0.0642908
GO_DNA_BIOSYNTHETIC_PROCESS	112	0.604558	1.86079	0.00206612	0.0636798
GO_REGULATION_OF_DNA_METABOLIC_PROCESS	329	0.508912	1.85936	0	0.0639865
GO_MULTI_ORGANISM_LOCALIZATION	66	0.62796	1.85828	0.00200803	0.0642199
GO_NEGATIVE_REGULATION_OF_ORGANELLE_ORGANIZATION	373	0.510913	1.85822	0	0.0635645
GO_ESTABLISHMENT_OR_MAINTENANCE_OF_CELL_POLARITY	137	0.509953	1.85753	0	0.0633091
GO_CELL_CYCLE_G1_S_PHASE_TRANSITION	108	0.621603	1.85573	0.00627615	0.064275
GO_NEGATIVE_REGULATION_OF_CYTOSKELETON_ORGANIZATION	212	0.513571	1.85555	0	0.0637639
GO_REGULATION_OF_ESTABLISHMENT_OF_PROTEIN_LOCALIZATION_TO_MITOCHONDRION	125	0.494702	1.85392	0	0.0643583
GO_NEGATIVE_REGULATION_OF_SUBSTRATE_ADHESION_DEPENDENT_CELL_SPREADING	12	0.768111	1.85358	0.00210526	0.0639836
GO_PROTEIN_SUMOYLATION	114	0.609285	1.85285	0	0.0637105
GO_ESTABLISHMENT_OF_CELL_POLARITY	86	0.520474	1.85233	0	0.0634757
GO_POSITIVE_REGULATION_OF_CELLULAR_PROTEIN_LOCALIZATION	341	0.46709	1.85166	0	0.0632723
GO_REGULATION_OF_PROTEIN_EXPORT_FROM_NUCLEUS	33	0.628937	1.85059	0	0.063463
GO_REGULATION_OF_CYTOSKELETON_ORGANIZATION	483	0.472578	1.85056	0	0.062858
GO_NEGATIVE_REGULATION_OF_CHROMOSOME_SEGREGATION	27	0.72004	1.8499	0	0.0626175
GO_EMBRYONIC_CRANIAL_SKELETON_MORPHOGENESIS	46	0.563128	1.84953	0.00217391	0.0622092
GO_REGULATION_OF_ORGANELLE_ORGANIZATION	1131	0.471047	1.84871	0	0.0622362
GO_APICAL_JUNCTION_ASSEMBLY	39	0.611046	1.84825	0.002079	0.0619438
GO_PEPTIDYL_METHIONINE_MODIFICATION	12	0.693643	1.84734	0	0.0619028
GO_TUBE_FORMATION	129	0.485662	1.84696	0	0.0616069
GO_CHROMATIN_REMODELING	145	0.526221	1.8467	0	0.0611698
GO_DNA_REPLICATION_INDEPENDENT_NUCLEOSOME_ORGANIZATION	51	0.649871	1.84633	0	0.0608658
GO_REGULATION_OF_CELLULAR_PROTEIN_LOCALIZATION	530	0.468278	1.84562	0	0.0610077
GO_NEGATIVE_REGULATION_OF_PROTEIN_BINDING	78	0.515667	1.84526	0	0.0606614
GO_CELL_CYCLE_G2_M_PHASE_TRANSITION	135	0.560261	1.84478	0	0.0603824
GO_MACROMOLECULE_CATABOLIC_PROCESS	888	0.481055	1.84444	0	0.0601757
GO_DNA_SYNTHESIS_INVOLVED_IN_DNA_REPAIR	72	0.617352	1.84384	0.00410678	0.0598999
GO_NEGATIVE_REGULATION_OF_CELL_CYCLE	413	0.491754	1.84272	0	0.0604941
GO_REGULATION_OF_CENTROSOME_DUPLICATION	31	0.664151	1.84239	0	0.060172
GO_NUCLEAR_TRANSPORT	348	0.520546	1.84237	0	0.0596654
GO_DNA_TEMPLATED_TRANSCRIPTION_ELONGATION	92	0.585791	1.84122	0	0.0600069
GO_NEGATIVE_REGULATION_OF_ERBB_SIGNALING_PATHWAY	44	0.596332	1.84104	0	0.0597298
GO_LUNG_CELL_DIFFERENTIATION	25	0.630946	1.84099	0.00437637	0.0592649
GO_MITOTIC_SPINDLE_ASSEMBLY	40	0.659438	1.84085	0	0.0588686
GO_SINGLE_ORGANISM_MEMBRANE_BUDDING	71	0.579574	1.84027	0.00208768	0.0588101
GO_PROTEIN_LOCALIZATION_TO_CYTOSKELETON	28	0.653463	1.83866	0	0.0595397
GO_CELLULAR_RESPONSE_TO_STRESS	1505	0.463206	1.83783	0	0.0596075
GO_VESICLE_TARGETING	76	0.574159	1.83595	0	0.0602719
GO_REGULATION_OF_LAMELLIPODIUM_ASSEMBLY	25	0.619551	1.83579	0.0021097	0.0599524
GO_SOMITE_DEVELOPMENT	77	0.483385	1.83428	0	0.0604259
GO_REGULATION_OF_CELLULAR_PROTEIN_CATABOLIC_PROCESS	267	0.532312	1.83373	0	0.0603038
GO_REGULATION_OF_MITOCHONDRIAL_OUTER_MEMBRANE_PERMEABILIZATION_INVOLVED_IN_APOPTOTIC_SIGNALING_PATHWAY	42	0.605249	1.83347	0.0021097	0.0601032
GO_PROTEASOMAL_PROTEIN_CATABOLIC_PROCESS	267	0.549594	1.83308	0	0.0600113
GO_TRANSCRIPTION_ELONGATION_FROM_RNA_POLYMERASE_II_PROMOTER	77	0.588232	1.83251	0.00191205	0.0600096
GO_PROTEIN_CATABOLIC_PROCESS	552	0.512438	1.83238	0	0.0595871
GO_RNA_LOCALIZATION	178	0.579885	1.83039	0	0.0606975
GO_DEVELOPMENTAL_CELL_GROWTH	75	0.505905	1.83022	0	0.0604197
GO_NUCLEAR_IMPORT	129	0.536287	1.82981	0	0.0602971
GO_POSITIVE_REGULATION_OF_PROTEIN_MODIFICATION_BY_SMALL_PROTEIN_CONJUGATION_OR_REMOVAL	192	0.537388	1.82964	0	0.0599472
GO_GENE_SILENCING	198	0.499348	1.82946	0	0.0596168
GO_POSITIVE_REGULATION_OF_CELL_DIVISION	129	0.460223	1.82811	0.00235294	0.0599986
GO_CENTROMERE_COMPLEX_ASSEMBLY	46	0.658651	1.82748	0	0.0598577
GO_SPINDLE_ASSEMBLY	69	0.624607	1.8268	0	0.0598064
GO_MEIOTIC_CHROMOSOME_SEGREGATION	59	0.504638	1.82627	0.00735294	0.0597979
GO_POSITIVE_REGULATION_OF_CELL_JUNCTION_ASSEMBLY	24	0.565603	1.82554	0.00218818	0.059851
GO_REGULATION_OF_TRANSLATIONAL_INITIATION	80	0.583084	1.82547	0	0.0594776
GO_EPITHELIAL_CELL_PROLIFERATION	89	0.490273	1.82525	0.00227273	0.0592336
GO_NUCLEOBASE_CONTAINING_COMPOUND_TRANSPORT	192	0.553535	1.82471	0	0.0591241
GO_ADP_METABOLIC_PROCESS	45	0.545099	1.82422	0.00934579	0.0590073
GO_GANGLION_DEVELOPMENT	13	0.664609	1.82398	0.00898876	0.0586799
GO_POSITIVE_REGULATION_OF_MITOTIC_NUCLEAR_DIVISION	50	0.553597	1.82382	0.00217865	0.0584199
GO_PEPTIDYL_ASPARAGINE_MODIFICATION	39	0.555339	1.82313	0.00419287	0.0583607
GO_MITOTIC_CYTOKINESIS	31	0.695712	1.82308	0	0.0580129
GO_MORPHOGENESIS_OF_AN_EPITHELIAL_SHEET	40	0.580822	1.82097	0.00209644	0.0589658
GO_NEGATIVE_REGULATION_OF_CELLULAR_COMPONENT_ORGANIZATION	664	0.449131	1.81838	0	0.0602546
GO_N_TERMINAL_PROTEIN_AMINO_ACID_MODIFICATION	24	0.616047	1.81683	0.00623701	0.0604664
GO_ESTABLISHMENT_OR_MAINTENANCE_OF_EPITHELIAL_CELL_APICAL_BASAL_POLARITY	28	0.557552	1.81617	0	0.060543
GO_VESICLE_COATING	74	0.563371	1.81539	0.00423729	0.0605747
GO_VIRION_ASSEMBLY	36	0.632489	1.812	0	0.0626263
GO_REGULATION_OF_LIGASE_ACTIVITY	128	0.564519	1.81081	0.0039604	0.062996
GO_POSITIVE_REGULATION_OF_LIGASE_ACTIVITY	108	0.581701	1.81073	0.0039604	0.0626461
GO_DNA_GEOMETRIC_CHANGE	79	0.645176	1.80885	0.00201613	0.0639135
GO_NEGATIVE_REGULATION_OF_CELL_CYCLE_PHASE_TRANSITION	141	0.553281	1.80833	0.00205761	0.0639339
GO_NEGATIVE_REGULATION_OF_PROTEIN_MODIFICATION_BY_SMALL_PROTEIN_CONJUGATION_OR_REMOVAL	135	0.578799	1.80829	0.00614754	0.0635576
GO_REGULATION_OF_PROTEIN_MODIFICATION_BY_SMALL_PROTEIN_CONJUGATION_OR_REMOVAL	273	0.518832	1.80654	0	0.0641104
GO_REGULATION_OF_SKELETAL_MUSCLE_ADAPTATION	13	0.659103	1.80614	0	0.0639489
GO_REGULATION_OF_CELLULAR_RESPONSE_TO_STRESS	674	0.475331	1.80611	0	0.0635697
GO_REGULATION_OF_DOUBLE_STRAND_BREAK_REPAIR	35	0.631518	1.80598	0.00205761	0.0633245
GO_NEUROBLAST_PROLIFERATION	29	0.548913	1.80541	0.00235294	0.0633702
GO_REGULATION_OF_ATTACHMENT_OF_SPINDLE_MICROTUBULES_TO_KINETOCHORE	10	0.836186	1.80511	0.00412371	0.0632027
GO_PROTEIN_COMPLEX_SUBUNIT_ORGANIZATION	1472	0.429311	1.80424	0	0.0634462
GO_IN_UTERO_EMBRYONIC_DEVELOPMENT	307	0.474566	1.80382	0	0.0632947
GO_REGULATION_OF_DNA_DAMAGE_RESPONSE_SIGNAL_TRANSDUCTION_BY_P53_CLASS_MEDIATOR	28	0.637473	1.80354	0.00205339	0.0632395
GO_PROTEIN_LOCALIZATION_TO_CHROMOSOME	42	0.639156	1.80332	0.00412371	0.0630981
GO_ERBB2_SIGNALING_PATHWAY	39	0.528827	1.80328	0.00838574	0.0627433
GO_NUCLEAR_EXPORT	143	0.592648	1.80254	0	0.0629024
GO_DOUBLE_STRAND_BREAK_REPAIR	158	0.556715	1.80249	0.002079	0.0625612
GO_PLACENTA_BLOOD_VESSEL_DEVELOPMENT	28	0.586626	1.80247	0.00204082	0.0622436
GO_MITOTIC_CHROMOSOME_CONDENSATION	14	0.796783	1.80141	0.00603622	0.0626645
GO_POSITIVE_REGULATION_OF_CANONICAL_WNT_SIGNALING_PATHWAY	117	0.51017	1.80108	0.00410678	0.0624556
GO_PROTEIN_LOCALIZATION_TO_NUCLEUS	153	0.518993	1.80101	0.00197628	0.0621649
GO_RESPONSE_TO_UV	121	0.528902	1.80099	0	0.0618215
GO_INTERSPECIES_INTERACTION_BETWEEN_ORGANISMS	646	0.482348	1.79986	0.00201207	0.0622816
GO_DNA_RECOMBINATION	199	0.551135	1.79972	0.00638298	0.0620587
GO_CELLULAR_COMPONENT_DISASSEMBLY	499	0.449695	1.79966	0	0.0617842
GO_REGULATION_OF_OLIGODENDROCYTE_DIFFERENTIATION	28	0.555519	1.79931	0.00462963	0.0616282
GO_NEGATIVE_REGULATION_OF_RECEPTOR_MEDIATED_ENDOCYTOSIS	17	0.613843	1.79889	0.00699301	0.0615165
GO_MEIOSIS_I	81	0.481944	1.79854	0.00954654	0.0614674
GO_RETROGRADE_VESICLE_MEDIATED_TRANSPORT_GOLGI_TO_ER	76	0.586845	1.79675	0.00408998	0.062111
GO_NUCLEAR_ENVELOPE_ORGANIZATION	77	0.61628	1.79596	0	0.0622697
GO_STRAND_DISPLACEMENT	26	0.747989	1.79578	0.00205761	0.0620793
GO_MITOTIC_DNA_INTEGRITY_CHECKPOINT	96	0.571616	1.79204	0	0.0644538
GO_NEGATIVE_REGULATION_OF_CELL_CYCLE_G2_M_PHASE_TRANSITION	24	0.671323	1.79192	0.00215517	0.0642434
GO_CELLULAR_RESPONSE_TO_RADIATION	134	0.496851	1.79149	0	0.0642346
GO_PROTEIN_LOCALIZATION_TO_ORGANELLE	538	0.481176	1.79129	0.00200803	0.0640086
GO_MACROMOLECULAR_COMPLEX_ASSEMBLY	1344	0.430094	1.78926	0	0.0649412
GO_ANTIGEN_PROCESSING_AND_PRESENTATION_OF_PEPTIDE_OR_POLYSACCHARIDE_ANTIGEN_VIA_MHC_CLASS_II	90	0.537428	1.78893	0.00412371	0.0648184
GO_POSITIVE_REGULATION_OF_TELOMERE_MAINTENANCE	46	0.616688	1.78854	0.00199601	0.0647003
GO_EMBRYO_DEVELOPMENT_ENDING_IN_BIRTH_OR_EGG_HATCHING	545	0.435166	1.78646	0	0.065946
GO_DNA_REPLICATION	199	0.58652	1.78597	0.00831601	0.0659325
GO_REGULATION_OF_DNA_TEMPLATED_TRANSCRIPTION_INITIATION	31	0.6015	1.78369	0.00207469	0.0673516
GO_ATTACHMENT_OF_SPINDLE_MICROTUBULES_TO_KINETOCHORE	14	0.774298	1.78312	0.0039604	0.0673692
GO_REGULATION_OF_PROTEASOMAL_PROTEIN_CATABOLIC_PROCESS	177	0.532935	1.78292	0	0.0671698
GO_REGULATION_OF_CHROMOSOME_ORGANIZATION	270	0.522225	1.78287	0	0.0668872
GO_MAINTENANCE_OF_PROTEIN_LOCALIZATION_IN_ORGANELLE	29	0.577216	1.78178	0	0.0674127
GO_RECOMBINATIONAL_REPAIR	72	0.590897	1.78055	0.00813008	0.0680457
GO_NEURON_PROJECTION_EXTENSION	52	0.532581	1.78026	0.00224215	0.0679557
GO_REGULATION_OF_CELLULAR_AMIDE_METABOLIC_PROCESS	336	0.492711	1.77902	0	0.068544
GO_CELL_DIFFERENTIATION_INVOLVED_IN_EMBRYONIC_PLACENTA_DEVELOPMENT	25	0.627335	1.77795	0.00210084	0.0689279
GO_NEGATIVE_REGULATION_OF_CELLULAR_PROTEIN_CATABOLIC_PROCESS	60	0.567792	1.77743	0.00200803	0.0690374
GO_POSITIVE_REGULATION_OF_MITOCHONDRION_ORGANIZATION	157	0.464998	1.77713	0	0.0688871
GO_RECIPROCAL_DNA_RECOMBINATION	39	0.55038	1.77697	0.00873363	0.0687183
GO_MITOTIC_G2_M_TRANSITION_CHECKPOINT	18	0.731905	1.77691	0.0021692	0.0684074
GO_POSITIVE_REGULATION_OF_CELL_CYCLE_ARREST	82	0.525287	1.77443	0	0.069578
GO_PROTEIN_MODIFICATION_BY_SMALL_PROTEIN_CONJUGATION_OR_REMOVAL	839	0.501658	1.77389	0	0.0696356
GO_POSITIVE_REGULATION_OF_CATENIN_IMPORT_INTO_NUCLEUS	12	0.647507	1.77387	0.00230947	0.0693204
GO_RIBONUCLEOPROTEIN_COMPLEX_LOCALIZATION	116	0.586698	1.77342	0.00197628	0.0692742
GO_REGULATION_OF_CELL_CYCLE_G1_S_PHASE_TRANSITION	142	0.524452	1.77332	0	0.0690562
GO_PROTEIN_MONOUBIQUITINATION	50	0.629221	1.77263	0.00195695	0.0692664
GO_SIGNAL_TRANSDUCTION_BY_P53_CLASS_MEDIATOR	123	0.51499	1.7721	0	0.0693091
GO_POSITIVE_REGULATION_OF_ERAD_PATHWAY	13	0.728702	1.77191	0	0.0691201
GO_REGULATION_OF_GENE_EXPRESSION_EPIGENETIC	217	0.488466	1.77144	0	0.0691498
GO_SIGNAL_TRANSDUCTION_IN_RESPONSE_TO_DNA_DAMAGE	93	0.557706	1.7714	0	0.0688495
GO_POSITIVE_REGULATION_OF_VIRAL_PROCESS	86	0.551099	1.77136	0.00601202	0.0685535
GO_PROTEIN_DNA_COMPLEX_SUBUNIT_ORGANIZATION	223	0.499805	1.77133	0.00224719	0.0682929
GO_NUCLEOTIDE_EXCISION_REPAIR	111	0.569625	1.77002	0.00198413	0.0689174
GO_MULTI_ORGANISM_ORGANELLE_ORGANIZATION	23	0.667623	1.76864	0.00992064	0.0692558
GO_POSTREPLICATION_REPAIR	51	0.6075	1.76858	0.00606061	0.0690169
GO_RESPONSE_TO_X_RAY	30	0.639841	1.76797	0.00211864	0.0691317
GO_POSITIVE_REGULATION_OF_ORGANELLE_ORGANIZATION	552	0.44738	1.76795	0	0.0688621
GO_FORMATION_OF_PRIMARY_GERM_LAYER	109	0.494991	1.76775	0.00226757	0.0687671
GO_MICROTUBULE_BASED_PROCESS	486	0.473986	1.76726	0	0.0687542
GO_POSITIVE_REGULATION_OF_VIRAL_RELEASE_FROM_HOST_CELL	15	0.735684	1.76719	0.00591716	0.0685245
GO_RNA_STABILIZATION	30	0.607294	1.76692	0.00408998	0.0684113
GO_EPHRIN_RECEPTOR_SIGNALING_PATHWAY	84	0.509783	1.76672	0.00220751	0.0682802
GO_PROTEIN_POLYUBIQUITINATION	241	0.537771	1.76573	0	0.068742
GO_REGULATION_OF_MEMBRANE_PERMEABILITY	69	0.529928	1.76567	0.00632911	0.0685032
GO_TELOMERE_ORGANIZATION	103	0.5615	1.76527	0.00873363	0.0684769
GO_GOLGI_ORGANIZATION	83	0.587072	1.76524	0	0.0682106
GO_PYRIMIDINE_NUCLEOSIDE_BIOSYNTHETIC_PROCESS	29	0.572672	1.76521	0.00213675	0.0679454
GO_ESTABLISHMENT_OF_EPITHELIAL_CELL_POLARITY	22	0.622384	1.76476	0.0040568	0.0678944
GO_LUNG_MORPHOGENESIS	45	0.559401	1.76452	0.00647948	0.0677873
GO_MORPHOGENESIS_OF_AN_EPITHELIUM	394	0.425291	1.76437	0	0.0675862
GO_TRANSCRIPTION_COUPLED_NUCLEOTIDE_EXCISION_REPAIR	72	0.594058	1.76426	0.00198807	0.0673628
GO_POSITIVE_REGULATION_OF_PROTEIN_CATABOLIC_PROCESS	258	0.497694	1.76387	0	0.0673209
GO_REGULATION_OF_PROTEIN_CATABOLIC_PROCESS	383	0.483163	1.76277	0	0.0676751
GO_SKIN_DEVELOPMENT	209	0.43158	1.76246	0.00468384	0.0676362
GO_POSITIVE_REGULATION_OF_G1_S_TRANSITION_OF_MITOTIC_CELL_CYCLE	24	0.613424	1.76194	0	0.067644
GO_EMBRYO_DEVELOPMENT	878	0.404046	1.76123	0	0.0679426
GO_POSITIVE_REGULATION_OF_TELOMERE_MAINTENANCE_VIA_TELOMERE_LENGTHENING	33	0.625123	1.7605	0.00397614	0.0681862
GO_CYTOSKELETON_ORGANIZATION	800	0.434747	1.75972	0	0.0684365
GO_PROTEIN_COMPLEX_BIOGENESIS	1090	0.414475	1.75972	0	0.068166
GO_AMP_METABOLIC_PROCESS	13	0.683561	1.75919	0.0043956	0.0681906
GO_REGULATION_OF_PROTEASOMAL_UBIQUITIN_DEPENDENT_PROTEIN_CATABOLIC_PROCESS	144	0.532374	1.75874	0.00394477	0.0682666
GO_PROTEIN_IMPORT	153	0.488542	1.75758	0	0.0685507
GO_CYTOPLASMIC_SEQUESTERING_OF_PROTEIN	40	0.537774	1.75709	0.00411523	0.068554
GO_REGULATION_OF_LAMELLIPODIUM_ORGANIZATION	34	0.562878	1.75563	0.00838574	0.0692265
GO_NEURAL_TUBE_DEVELOPMENT	147	0.470555	1.75462	0.00214592	0.0693836
GO_NEGATIVE_REGULATION_OF_HISTONE_MODIFICATION	36	0.616707	1.75366	0	0.0697491
GO_REGULATION_OF_APOPTOTIC_SIGNALING_PATHWAY	354	0.434883	1.75325	0.00217865	0.0697607
GO_POSITIVE_REGULATION_OF_EXTRACELLULAR_MATRIX_ORGANIZATION	15	0.637551	1.75264	0.00659341	0.0698568
GO_DNA_TEMPLATED_TRANSCRIPTION_TERMINATION	98	0.589212	1.7524	0.00194553	0.0697122
GO_POSITIVE_REGULATION_OF_DNA_REPAIR	37	0.583131	1.75225	0.00831601	0.0695505
GO_POSITIVE_REGULATION_OF_WNT_SIGNALING_PATHWAY	150	0.483133	1.75215	0.00203252	0.069334
GO_PEPTIDYL_LYSINE_MODIFICATION	295	0.527496	1.75209	0.002	0.0691284
GO_ER_NUCLEUS_SIGNALING_PATHWAY	32	0.643765	1.75195	0.00847458	0.0689925
GO_PYRIMIDINE_CONTAINING_COMPOUND_BIOSYNTHETIC_PROCESS	39	0.532062	1.75135	0.0021692	0.0685798
GO_MAINTENANCE_OF_LOCATION	136	0.436018	1.75037	0	0.0687295
GO_G1_DNA_DAMAGE_CHECKPOINT	70	0.565211	1.75011	0	0.0687524
GO_REGULATION_OF_SPINDLE_ASSEMBLY	14	0.77943	1.7494	0.00200803	0.0689451
GO_ER_TO_GOLGI_VESICLE_MEDIATED_TRANSPORT	161	0.531434	1.74938	0	0.0687043
GO_CELL_JUNCTION_ORGANIZATION	183	0.473568	1.74907	0.00639659	0.0686907
GO_MORPHOGENESIS_OF_EMBRYONIC_EPITHELIUM	133	0.451988	1.7479	0	0.0691198
GO_RNA_3_END_PROCESSING	96	0.567306	1.74755	0.00406504	0.0690887
GO_NEGATIVE_REGULATION_OF_BINDING	130	0.470152	1.74725	0.00211864	0.0687634
GO_SALIVARY_GLAND_DEVELOPMENT	32	0.545794	1.74607	0.00455581	0.0692697
GO_PROTEIN_UBIQUITINATION	611	0.482009	1.74598	0	0.0690734
GO_PORE_COMPLEX_ASSEMBLY	15	0.744017	1.74528	0.00392927	0.0691923
GO_CELLULAR_RESPONSE_TO_OXYGEN_LEVELS	141	0.4365	1.74454	0	0.0692173
GO_CELL_PROLIFERATION	661	0.406927	1.74411	0	0.0692127
GO_DNA_STRAND_ELONGATION	30	0.724144	1.74349	0.00843882	0.0694267
GO_MODULATION_BY_VIRUS_OF_HOST_MORPHOLOGY_OR_PHYSIOLOGY	37	0.557458	1.74339	0.00399202	0.0692162
GO_GASTRULATION	150	0.445232	1.74297	0.00228311	0.0692315
GO_NEGATIVE_REGULATION_OF_DNA_DAMAGE_RESPONSE_SIGNAL_TRANSDUCTION_BY_P53_CLASS_MEDIATOR	13	0.705695	1.74179	0.00404858	0.0699566
GO_RNA_SPLICING_VIA_TRANSESTERIFICATION_REACTIONS	261	0.553586	1.74077	0.00198807	0.0704006
GO_REGULATION_OF_PHOSPHOPROTEIN_PHOSPHATASE_ACTIVITY	57	0.557363	1.74047	0	0.0703575
GO_RESPONSE_TO_IONIZING_RADIATION	139	0.515093	1.74013	0.00609756	0.0703999
GO_REGULATION_OF_RNA_POLYMERASE_II_TRANSCRIPTIONAL_PREINITIATION_COMPLEX_ASSEMBLY	13	0.702484	1.73848	0.00394477	0.0712585
GO_ENDOMEMBRANE_SYSTEM_ORGANIZATION	454	0.466286	1.73793	0.00200401	0.0711545
GO_PROTEOLYSIS	1122	0.407302	1.73767	0	0.0708469
GO_CHROMATIN_ORGANIZATION	636	0.470353	1.73647	0	0.0714061
GO_POSITIVE_REGULATION_OF_DNA_BIOSYNTHETIC_PROCESS	58	0.554233	1.73573	0.00613497	0.0713559
GO_DNA_DOUBLE_STRAND_BREAK_PROCESSING	20	0.673952	1.7353	0.00403226	0.0713976
GO_ENDOSOME_ORGANIZATION	59	0.588078	1.73471	0.004	0.0716822
GO_POSITIVE_REGULATION_OF_PROTEOLYSIS	359	0.460557	1.73464	0	0.071507
GO_NON_CANONICAL_WNT_SIGNALING_PATHWAY	136	0.491591	1.73456	0.0040404	0.071341
GO_FIBROBLAST_GROWTH_FACTOR_RECEPTOR_SIGNALING_PATHWAY	84	0.456499	1.73454	0	0.071123
GO_LABYRINTHINE_LAYER_DEVELOPMENT	44	0.550729	1.73422	0.002	0.0711132
GO_CELLULAR_RESPONSE_TO_ABIOTIC_STIMULUS	255	0.433288	1.73409	0	0.0710113
GO_POSITIVE_REGULATION_OF_NUCLEAR_DIVISION	61	0.486603	1.73324	0.00900901	0.071174
GO_REGULATION_OF_CATABOLIC_PROCESS	717	0.449986	1.73265	0	0.0713706
GO_MESODERM_MORPHOGENESIS	65	0.495188	1.73244	0.00666667	0.0712879
GO_CELLULAR_RESPONSE_TO_GAMMA_RADIATION	19	0.664031	1.73215	0.00398406	0.0713142
GO_ESTABLISHMENT_OF_MITOTIC_SPINDLE_LOCALIZATION	23	0.644946	1.73146	0.00990099	0.0715921
GO_CELLULAR_CARBOHYDRATE_METABOLIC_PROCESS	136	0.442205	1.73111	0.00232558	0.071609
GO_REGULATION_OF_CELL_CYCLE_ARREST	103	0.484653	1.73101	0	0.0714542
GO_RNA_PHOSPHODIESTER_BOND_HYDROLYSIS_EXONUCLEOLYTIC	34	0.617264	1.73052	0.0020284	0.0713465
GO_REGULATION_OF_ORGAN_MORPHOGENESIS	241	0.440119	1.73045	0	0.0712138
GO_MRNA_3_END_PROCESSING	71	0.607884	1.73036	0.00196078	0.0710611
GO_GLUCAN_METABOLIC_PROCESS	55	0.495046	1.7297	0	0.0712327
GO_MITOTIC_G2_DNA_DAMAGE_CHECKPOINT	13	0.745069	1.72955	0.00218818	0.0710953
GO_POSITIVE_REGULATION_OF_ERBB_SIGNALING_PATHWAY	34	0.497823	1.72928	0.00476191	0.071138
GO_POSITIVE_REGULATION_OF_RESPONSE_TO_CYTOKINE_STIMULUS	32	0.568999	1.72758	0.00211864	0.0722086
GO_POSITIVE_REGULATION_OF_TRANSFERASE_ACTIVITY	601	0.418316	1.72726	0	0.0721697
GO_CRANIAL_SKELETAL_SYSTEM_DEVELOPMENT	55	0.516072	1.72709	0.0043384	0.0720358
GO_CELLULAR_CARBOHYDRATE_BIOSYNTHETIC_PROCESS	50	0.475111	1.72698	0.00472813	0.0719289
GO_EXECUTION_PHASE_OF_APOPTOSIS	53	0.539999	1.72697	0.0021097	0.0717144
GO_RNA_DEPENDENT_DNA_BIOSYNTHETIC_PROCESS	20	0.656712	1.72614	0.00409836	0.071905
GO_PLACENTA_DEVELOPMENT	136	0.45758	1.72599	0.00211864	0.0716009
GO_POSITIVE_REGULATION_OF_RESPONSE_TO_DNA_DAMAGE_STIMULUS	62	0.523919	1.72558	0.00421053	0.0716653
GO_REGULATION_OF_MITOCHONDRION_ORGANIZATION	205	0.444756	1.72499	0	0.0718759
GO_REGULATION_OF_DNA_TEMPLATED_TRANSCRIPTION_IN_RESPONSE_TO_STRESS	67	0.519143	1.72488	0	0.0717205
GO_BLASTOCYST_DEVELOPMENT	60	0.536462	1.72323	0.00614754	0.0725095
GO_CHROMATIN_MODIFICATION	519	0.492276	1.72319	0.00204082	0.0723227
GO_ENDODERM_DEVELOPMENT	70	0.503207	1.72281	0.00451467	0.0723829
GO_NUCLEAR_TRANSCRIBED_MRNA_CATABOLIC_PROCESS_DEADENYLATION_DEPENDENT_DECAY	55	0.578798	1.7228	0.00197239	0.0721713
GO_RNA_SPLICING	355	0.530768	1.7219	0.00198413	0.0723961
GO_REGULATION_OF_NUCLEOCYTOPLASMIC_TRANSPORT	218	0.458825	1.72161	0	0.0723575
GO_CELLULAR_MACROMOLECULE_LOCALIZATION	1197	0.430048	1.7211	0	0.0724828
GO_POSITIVE_REGULATION_OF_CHROMOSOME_ORGANIZATION	146	0.518505	1.72013	0	0.0724781
GO_INTRINSIC_APOPTOTIC_SIGNALING_PATHWAY	150	0.457977	1.71979	0	0.072535
GO_VASCULAR_ENDOTHELIAL_GROWTH_FACTOR_RECEPTOR_SIGNALING_PATHWAY	74	0.516288	1.71918	0.0060241	0.0726966
GO_NEGATIVE_REGULATION_OF_CHROMOSOME_ORGANIZATION	94	0.571313	1.71913	0.00621118	0.0725341
GO_MICROTUBULE_ORGANIZING_CENTER_ORGANIZATION	82	0.567261	1.71876	0.004	0.0725413
GO_TELOMERE_MAINTENANCE_VIA_TELOMERE_LENGTHENING	25	0.635621	1.7184	0.00828157	0.0724135
GO_POSITIVE_REGULATION_OF_ORGANELLE_ASSEMBLY	46	0.544222	1.71794	0.00826446	0.0723694
GO_REGULATION_OF_PROTEIN_LOCALIZATION_TO_CHROMOSOME_TELOMERIC_REGION	14	0.771732	1.71787	0.00397614	0.0721979
GO_CELLULAR_MACROMOLECULAR_COMPLEX_ASSEMBLY	687	0.441112	1.71649	0.00431965	0.0727769
GO_REGULATION_OF_TELOMERE_MAINTENANCE	65	0.581175	1.71618	0.00598802	0.0725642
GO_REGULATION_OF_AUTOPHAGY	246	0.479244	1.71434	0	0.0736759
GO_CELLULAR_RESPONSE_TO_DSRNA	34	0.587068	1.71365	0	0.0737338
GO_POSITIVE_REGULATION_OF_CATABOLIC_PROCESS	389	0.453499	1.71061	0	0.0750743
GO_NEGATIVE_REGULATION_OF_PROTEIN_TYROSINE_KINASE_ACTIVITY	20	0.607849	1.7089	0.00842105	0.075836
GO_PROTEIN_DEPOLYMERIZATION	24	0.542523	1.70862	0.00421941	0.075675
GO_CELLULAR_PROTEIN_COMPLEX_LOCALIZATION	22	0.590443	1.70859	0.0040568	0.0754913
GO_NEGATIVE_REGULATION_OF_APOPTOTIC_SIGNALING_PATHWAY	193	0.431193	1.70855	0.0021978	0.0753088
GO_MODULATION_BY_SYMBIONT_OF_HOST_CELLULAR_PROCESS	28	0.590502	1.70843	0.00583658	0.0751747
GO_TISSUE_MORPHOGENESIS	525	0.395031	1.70694	0	0.0759331
GO_COVALENT_CHROMATIN_MODIFICATION	329	0.501186	1.70677	0.00200401	0.0758196
GO_REGULATION_OF_PROTEOLYSIS	694	0.394258	1.70652	0	0.0757904
GO_RNA_POLYADENYLATION	29	0.635398	1.70602	0.00202429	0.0759222
GO_NEGATIVE_REGULATION_OF_SMALL_GTPASE_MEDIATED_SIGNAL_TRANSDUCTION	40	0.544381	1.70598	0.00210526	0.075771
GO_EPITHELIAL_CELL_APOPTOTIC_PROCESS	25	0.590661	1.70597	0.00425532	0.0755825
GO_DEVELOPMENTAL_GROWTH	324	0.411944	1.7053	0.00222222	0.0758097
GO_MAMMARY_GLAND_DEVELOPMENT	116	0.423062	1.70491	0	0.0756603
GO_TERMINATION_OF_RNA_POLYMERASE_II_TRANSCRIPTION	61	0.604719	1.70479	0.00585938	0.0755264
GO_POSITIVE_REGULATION_OF_MULTI_ORGANISM_PROCESS	151	0.465048	1.70439	0.002079	0.0756488
GO_PROTEIN_EXPORT_FROM_NUCLEUS	29	0.616539	1.70358	0.00195695	0.0758178
GO_DENDRITIC_SPINE_ORGANIZATION	16	0.561182	1.70335	0.00462963	0.0757707
GO_LOCALIZATION_WITHIN_MEMBRANE	119	0.45428	1.70303	0.00428265	0.0757831
GO_HISTONE_MRNA_METABOLIC_PROCESS	28	0.635204	1.70253	0.00809717	0.0759844
GO_CELLULAR_RESPONSE_TO_UV	65	0.522515	1.70189	0.00632911	0.076223
GO_NCRNA_TRANSCRIPTION	81	0.557583	1.70125	0	0.0762503
GO_LENS_DEVELOPMENT_IN_CAMERA_TYPE_EYE	65	0.453429	1.70121	0	0.0760839
GO_MAINTENANCE_OF_CELL_NUMBER	132	0.4584	1.70057	0.00411523	0.0763801
GO_PEPTIDYL_AMINO_ACID_MODIFICATION	813	0.433196	1.7002	0	0.0763854
GO_TETRAHYDROFOLATE_INTERCONVERSION	11	0.642488	1.70014	0.00961539	0.0762125
GO_SOMITOGENESIS	62	0.450559	1.69867	0.00242718	0.076717
GO_CELLULAR_COMPONENT_DISASSEMBLY_INVOLVED_IN_EXECUTION_PHASE_OF_APOPTOSIS	41	0.545229	1.69818	0.00210526	0.0767645
GO_REGULATION_OF_PROTEIN_COMPLEX_ASSEMBLY	360	0.436596	1.69712	0	0.0773075
GO_CELL_CYCLE_ARREST	143	0.465637	1.69599	0	0.0779303
GO_NEGATIVE_REGULATION_OF_RESPONSE_TO_DNA_DAMAGE_STIMULUS	49	0.549091	1.69582	0.00204499	0.0778444
GO_SOMATIC_DIVERSIFICATION_OF_IMMUNOGLOBULINS	26	0.624755	1.69568	0.00838574	0.0777714
GO_REGULATION_OF_ORGANELLE_ASSEMBLY	145	0.497166	1.69461	0.00401606	0.0784581
GO_NEGATIVE_REGULATION_OF_CELLULAR_AMIDE_METABOLIC_PROCESS	124	0.483554	1.6943	0.00205761	0.0782789
GO_POSITIVE_REGULATION_OF_PROTEASOMAL_PROTEIN_CATABOLIC_PROCESS	98	0.517662	1.69423	0	0.0781284
GO_REGULATION_OF_PROTEIN_TYROSINE_KINASE_ACTIVITY	60	0.476811	1.69389	0.00232558	0.07824
GO_SNRNA_METABOLIC_PROCESS	75	0.552839	1.69352	0.00976562	0.0782892
GO_ERBB_SIGNALING_PATHWAY	78	0.499783	1.69271	0.00627615	0.0787332
GO_NEGATIVE_REGULATION_OF_CANONICAL_WNT_SIGNALING_PATHWAY	159	0.458124	1.69238	0.00607287	0.0788172
GO_REGULATION_OF_HISTONE_H3_K9_METHYLATION	17	0.618876	1.69165	0.00917431	0.079102
GO_RESPONSE_TO_RADIATION	398	0.412103	1.69075	0	0.079589
GO_WNT_SIGNALING_PATHWAY	339	0.430985	1.69007	0	0.0798048
GO_EPITHELIUM_DEVELOPMENT	932	0.365352	1.68961	0	0.0799965
GO_MULTICELLULAR_ORGANISM_GROWTH	75	0.456709	1.68886	0.00218341	0.08036
GO_MATERNAL_PROCESS_INVOLVED_IN_FEMALE_PREGNANCY	59	0.473955	1.68726	0.00860215	0.080735
GO_POSITIVE_REGULATION_OF_APOPTOTIC_SIGNALING_PATHWAY	169	0.451762	1.68719	0.00206186	0.0805906
GO_GLAND_MORPHOGENESIS	97	0.448554	1.68711	0	0.08029
GO_PROTEIN_ACETYLATION	118	0.504803	1.68694	0.0059761	0.08021
GO_GOLGI_VESICLE_TRANSPORT	312	0.496257	1.68642	0.00421941	0.0803936
GO_RESPONSE_TO_EPIDERMAL_GROWTH_FACTOR	28	0.558762	1.68536	0.00813008	0.0803867
GO_CELLULAR_RESPONSE_TO_IONIZING_RADIATION	50	0.572951	1.68527	0.00613497	0.0802973
GO_REGULATION_OF_PROTEIN_PHOSPHATASE_TYPE_2A_ACTIVITY	24	0.64581	1.68478	0.004158	0.0804791
GO_PROTEIN_AUTOUBIQUITINATION	49	0.575475	1.68429	0.00591716	0.0804541
GO_CELLULAR_RESPONSE_TO_LIGHT_STIMULUS	90	0.457968	1.68426	0.00213675	0.0803002
GO_INTRINSIC_APOPTOTIC_SIGNALING_PATHWAY_IN_RESPONSE_TO_DNA_DAMAGE	70	0.517154	1.68328	0.00594059	0.0805412
GO_ORGANELLE_LOCALIZATION	401	0.434763	1.68133	0	0.0813922
GO_CENTROSOME_LOCALIZATION	17	0.656413	1.68056	0.00607287	0.0815292
GO_PROTEIN_ALKYLATION	107	0.476592	1.67875	0.00626305	0.0820476
GO_POSITIVE_REGULATION_OF_CELL_CYCLE_G1_S_PHASE_TRANSITION	28	0.561723	1.67839	0.00884956	0.0821552
GO_POSITIVE_REGULATION_OF_SIGNAL_TRANSDUCTION_BY_P53_CLASS_MEDIATOR	17	0.577434	1.67665	0.00904977	0.082553
GO_PEPTIDYL_PROLINE_MODIFICATION	53	0.466877	1.67611	0.00826446	0.082724
GO_GLAND_DEVELOPMENT	392	0.364687	1.67575	0	0.0825913
GO_REGULATION_OF_NIK_NF_KAPPAB_SIGNALING	42	0.57024	1.67479	0.00795229	0.0831041
GO_REGULATION_OF_TRANSFERASE_ACTIVITY	922	0.396654	1.67423	0	0.0831754
GO_HISTONE_H2A_MONOUBIQUITINATION	12	0.720308	1.67368	0.00389105	0.0833929
GO_REGULATION_OF_FIBROBLAST_GROWTH_FACTOR_RECEPTOR_SIGNALING_PATHWAY	25	0.522715	1.67318	0.00892857	0.0835115
GO_REGULATION_OF_PROTEIN_BINDING	167	0.432546	1.67308	0	0.083406
GO_POSITIVE_REGULATION_OF_TELOMERASE_ACTIVITY	28	0.572104	1.67098	0.00829876	0.0846448
GO_REGULATION_OF_BINDING	281	0.420422	1.6707	0	0.0846825
GO_TUBE_MORPHOGENESIS	323	0.405654	1.67039	0.00224215	0.0847219
GO_EMBRYONIC_PLACENTA_DEVELOPMENT	83	0.483814	1.66961	0.00824742	0.0847261
GO_REGULATION_OF_PEPTIDYL_THREONINE_PHOSPHORYLATION	35	0.5348	1.66915	0.00212314	0.0846591
GO_INTERACTION_WITH_HOST	132	0.451338	1.66897	0.00875273	0.0846399
GO_STEM_CELL_PROLIFERATION	60	0.453649	1.66636	0.0046083	0.0859277
GO_REGULATION_OF_INTRACELLULAR_PROTEIN_TRANSPORT	363	0.414228	1.66631	0	0.0857879
GO_REGULATION_OF_CELLULAR_RESPONSE_TO_HEAT	74	0.575437	1.66616	0.00632911	0.0857445
GO_REGULATION_OF_RESPONSE_TO_EXTRACELLULAR_STIMULUS	170	0.472168	1.66615	0.00790514	0.0855745
GO_DNA_TEMPLATED_TRANSCRIPTION_INITIATION	201	0.445548	1.66598	0.0039604	0.0855217
GO_REGULATION_OF_CELL_MATRIX_ADHESION	88	0.479965	1.66493	0.00833333	0.085773
GO_NEGATIVE_REGULATION_OF_WNT_SIGNALING_PATHWAY	192	0.434743	1.66478	0.00622407	0.0857182
GO_RAS_PROTEIN_SIGNAL_TRANSDUCTION	143	0.475123	1.66426	0.00968992	0.0857058
GO_REGULATION_OF_SISTER_CHROMATID_COHESION	17	0.701773	1.66347	0.00784314	0.0857534
GO_POLYSACCHARIDE_METABOLIC_PROCESS	76	0.447021	1.6634	0.00229358	0.0856406
GO_CANONICAL_WNT_SIGNALING_PATHWAY	93	0.440187	1.66302	0.00456621	0.0857254
GO_MRNA_PROCESSING	418	0.499444	1.66275	0.00998004	0.0857621
GO_REGULATION_OF_WNT_SIGNALING_PATHWAY	302	0.417021	1.66251	0.002079	0.0857455
GO_MACROMITOPHAGY	130	0.411263	1.6625	0.00229358	0.0855734
GO_ESTABLISHMENT_OF_LOCALIZATION_IN_CELL	1621	0.413098	1.66161	0.00210526	0.085706
GO_ACTIN_CYTOSKELETON_REORGANIZATION	54	0.519321	1.66124	0.00808081	0.0854341
GO_RESPONSE_TO_FIBROBLAST_GROWTH_FACTOR	115	0.419933	1.66103	0	0.0854275
GO_REGULATION_OF_CHROMATIN_ORGANIZATION	148	0.470745	1.66055	0.00410678	0.0853156
GO_REGULATION_OF_CANONICAL_WNT_SIGNALING_PATHWAY	231	0.424987	1.66023	0.00414079	0.0854014
GO_POSITIVE_REGULATION_OF_CHROMOSOME_SEGREGATION	25	0.662632	1.65977	0.00608519	0.0854206
GO_POSITIVE_REGULATION_OF_INTRACELLULAR_PROTEIN_TRANSPORT	241	0.412235	1.65821	0	0.0862591
GO_PROTEIN_MODIFICATION_BY_SMALL_PROTEIN_REMOVAL	118	0.523142	1.65795	0.00603622	0.0862982
GO_PARAXIAL_MESODERM_DEVELOPMENT	16	0.605216	1.65751	0.00904977	0.0864002
GO_EXOCRINE_SYSTEM_DEVELOPMENT	45	0.447016	1.65749	0.00947867	0.086248
GO_NEGATIVE_REGULATION_OF_TRANSFERASE_ACTIVITY	344	0.414319	1.65657	0	0.0863417
GO_REGULATION_OF_GLYCOGEN_METABOLIC_PROCESS	34	0.466645	1.65634	0.00672646	0.0864145
GO_NEGATIVE_REGULATION_OF_PROTEIN_METABOLIC_PROCESS	1053	0.379234	1.65615	0	0.0859244
GO_INTRACELLULAR_PROTEIN_TRANSPORT	760	0.422005	1.65593	0.00801603	0.0858206
GO_PROTEIN_LOCALIZATION	1749	0.403658	1.65456	0	0.0863825
GO_REGULATION_OF_PROTEIN_LOCALIZATION_TO_NUCLEUS	215	0.425938	1.65453	0.004	0.0862537
GO_REGULATION_OF_RETINOIC_ACID_RECEPTOR_SIGNALING_PATHWAY	30	0.513075	1.65445	0.00874126	0.0861677
GO_NEGATIVE_REGULATION_OF_PROTEIN_COMPLEX_ASSEMBLY	104	0.424839	1.65438	0.00431965	0.0860306
GO_SEGMENTATION	89	0.418425	1.65422	0.00261097	0.0856693
GO_SINGLE_ORGANISM_CELLULAR_LOCALIZATION	873	0.403875	1.65346	0	0.0858157
GO_NEGATIVE_REGULATION_OF_CELL_CYCLE_G1_S_PHASE_TRANSITION	94	0.503212	1.65311	0.00406504	0.0859004
GO_TUBE_DEVELOPMENT	548	0.3836	1.65284	0.0045977	0.0859364
GO_CARDIAC_VENTRICLE_DEVELOPMENT	105	0.423232	1.65216	0.00717703	0.0859175
GO_POSITIVE_REGULATION_OF_INTRACELLULAR_TRANSPORT	351	0.404571	1.65138	0	0.0861736
GO_POSITIVE_REGULATION_OF_CELLULAR_COMPONENT_ORGANIZATION	1110	0.380764	1.65102	0	0.0861425
GO_CELL_GROWTH	133	0.425481	1.6503	0.00869565	0.0863285
GO_NEURAL_PRECURSOR_CELL_PROLIFERATION	70	0.425296	1.64941	0.00239808	0.0859622
GO_CATABOLIC_PROCESS	1707	0.375376	1.64819	0	0.0864179
GO_SOMATIC_STEM_CELL_POPULATION_MAINTENANCE	66	0.434237	1.64713	0.00650759	0.0867294
GO_MOLTING_CYCLE	82	0.430877	1.64692	0.00934579	0.0865575
GO_NEGATIVE_REGULATION_OF_PROTEIN_MODIFICATION_PROCESS	601	0.405507	1.64469	0	0.087292
GO_TOR_SIGNALING	16	0.622146	1.64448	0.00401606	0.0872866
GO_NUCLEAR_TRANSCRIBED_MRNA_POLY_A_TAIL_SHORTENING	24	0.65874	1.64432	0.00591716	0.0872402
GO_PROSTATE_GLAND_DEVELOPMENT	41	0.477367	1.64323	0.00911162	0.0874737
GO_RESPONSE_TO_ENDOPLASMIC_RETICULUM_STRESS	227	0.452811	1.64148	0.00417537	0.0880298
GO_NEGATIVE_REGULATION_OF_CELLULAR_CATABOLIC_PROCESS	152	0.435322	1.63999	0.00621118	0.0884962
GO_ENDOTHELIAL_CELL_PROLIFERATION	24	0.556121	1.63963	0.00858369	0.088159
GO_PROTEIN_K11_LINKED_UBIQUITINATION	27	0.599783	1.63784	0.00575816	0.0884343
GO_NEGATIVE_REGULATION_OF_CELL_DEATH	845	0.373719	1.63577	0	0.0893641
GO_POSITIVE_REGULATION_OF_CYTOPLASMIC_TRANSPORT	275	0.403407	1.63481	0.00421941	0.0897971
GO_POSITIVE_REGULATION_OF_CELL_GROWTH	145	0.406891	1.63452	0	0.08985
GO_ESTABLISHMENT_OF_PROTEIN_LOCALIZATION	1381	0.403139	1.63429	0.00413223	0.0898677
GO_TRANSCRIPTION_INITIATION_FROM_RNA_POLYMERASE_II_PROMOTER	152	0.454056	1.63418	0.00396825	0.0896432
GO_PROTEIN_ACYLATION	148	0.473647	1.6334	0.00592885	0.0898467
GO_REGULATION_OF_PHOSPHATASE_ACTIVITY	121	0.453885	1.63276	0	0.0899906
GO_CARBOHYDRATE_DERIVATIVE_BIOSYNTHETIC_PROCESS	572	0.384404	1.63273	0	0.0898666
GO_PROTEIN_DEPHOSPHORYLATION	186	0.439221	1.63225	0	0.0900754
GO_REGULATION_OF_VACUOLAR_TRANSPORT	29	0.581343	1.63215	0.00811359	0.0900086
GO_CELLULAR_CATABOLIC_PROCESS	1273	0.392494	1.63182	0.00222222	0.0896529
GO_NEGATIVE_REGULATION_OF_GENE_EXPRESSION	1446	0.387456	1.63107	0	0.0898472
GO_REGULATION_OF_CYSTEINE_TYPE_ENDOPEPTIDASE_ACTIVITY	210	0.420167	1.6278	0.00428265	0.0914059
GO_PROTEIN_K48_LINKED_UBIQUITINATION	47	0.570525	1.62739	0.0094697	0.0912697
GO_MESODERM_DEVELOPMENT	116	0.408698	1.62697	0.00228833	0.0912684
GO_REPRODUCTION	1243	0.33745	1.62615	0	0.0912956
GO_EMBRYONIC_MORPHOGENESIS	532	0.368903	1.6256	0.00478469	0.0912475
GO_REGULATION_OF_CELLULAR_COMPONENT_SIZE	326	0.385283	1.62529	0	0.0913176
GO_EPITHELIAL_CELL_DEVELOPMENT	185	0.388122	1.62517	0.00447427	0.0912722
GO_ORGANELLE_ASSEMBLY	467	0.425479	1.62405	0.00440529	0.0913312
GO_GLYCOPROTEIN_METABOLIC_PROCESS	338	0.39164	1.62371	0.00909091	0.0914219
GO_GLYCOSYLATION	252	0.411446	1.62364	0.00447427	0.0913404
GO_CYTOKINETIC_PROCESS	14	0.657207	1.62301	0.00813008	0.0914576
GO_REGULATION_OF_INTRACELLULAR_TRANSPORT	598	0.384811	1.62146	0	0.0922314
GO_REGULATION_OF_CELLULAR_COMPONENT_BIOGENESIS	739	0.392235	1.62056	0.00424628	0.0924775
GO_REGULATION_OF_PROTEIN_LOCALIZATION	916	0.375747	1.61966	0	0.0927695
GO_REGULATION_OF_TELOMERASE_ACTIVITY	41	0.519643	1.61905	0.00835073	0.0928982
GO_CELL_DEATH	972	0.386428	1.61843	0.00214592	0.0930313
GO_REGULATION_OF_CYTOPLASMIC_TRANSPORT	471	0.393525	1.61775	0	0.0932536
GO_PROTEIN_HETEROOLIGOMERIZATION	112	0.406674	1.61762	0.00980392	0.0932135
GO_REGULATION_OF_RESPONSE_TO_STRESS	1435	0.389338	1.61739	0.00863931	0.0932196
GO_NEGATIVE_REGULATION_OF_MOLECULAR_FUNCTION	1049	0.352777	1.617	0	0.0933709
GO_ENDOPLASMIC_RETICULUM_ORGANIZATION	38	0.556692	1.61232	0.00635593	0.0955667
GO_REPRODUCTIVE_SYSTEM_DEVELOPMENT	403	0.373099	1.61208	0.00925926	0.0954512
GO_INNER_CELL_MASS_CELL_PROLIFERATION	10	0.745938	1.61145	0.00986193	0.0954852
GO_NEGATIVE_REGULATION_OF_CYSTEINE_TYPE_ENDOPEPTIDASE_ACTIVITY	87	0.43526	1.60914	0	0.096415
GO_AUTOPHAGY	373	0.415593	1.60877	0.00208333	0.0964571
GO_REGULATION_OF_PROTEIN_TARGETING_TO_MITOCHONDRION	95	0.424139	1.60728	0.00635593	0.0973814
GO_MEMBRANE_ORGANIZATION	854	0.382837	1.59763	0.00860215	0.101469
GO_SMALL_GTPASE_MEDIATED_SIGNAL_TRANSDUCTION	345	0.408371	1.59553	0.00811359	0.102483
GO_MACROAUTOPHAGY	265	0.401083	1.5954	0.0041841	0.102314
GO_INACTIVATION_OF_MAPK_ACTIVITY	26	0.495243	1.59396	0.00888889	0.103178
GO_REGULATION_OF_EARLY_ENDOSOME_TO_LATE_ENDOSOME_TRANSPORT	16	0.679916	1.59381	0.00996016	0.103151
GO_HEPATICOBILIARY_SYSTEM_DEVELOPMENT	127	0.393415	1.59077	0.00245098	0.104261
GO_TRANSCRIPTION_FROM_RNA_POLYMERASE_II_PROMOTER	707	0.390451	1.59077	0.00421941	0.104123
GO_ORGANELLE_DISASSEMBLY	179	0.399035	1.59038	0.00649351	0.103875
GO_REGULATION_OF_PROTEIN_STABILITY	212	0.418827	1.59026	0.00210526	0.103818
GO_CELLULAR_RESPONSE_TO_TOPOLOGICALLY_INCORRECT_PROTEIN	118	0.461772	1.58901	0.00854701	0.104006
GO_REGENERATION	157	0.384735	1.58757	0.00478469	0.104527
GO_POSITIVE_REGULATION_OF_BINDING	126	0.412687	1.58754	0.00643777	0.104416
GO_TRANSMEMBRANE_RECEPTOR_PROTEIN_TYROSINE_KINASE_SIGNALING_PATHWAY	494	0.381761	1.58665	0.00860215	0.104821
GO_POSITIVE_REGULATION_OF_ESTABLISHMENT_OF_PROTEIN_LOCALIZATION	490	0.367322	1.58644	0.0045045	0.104652
GO_POSITIVE_REGULATION_OF_GENE_EXPRESSION	1687	0.369318	1.58636	0.00636943	0.10429
GO_REGULATION_OF_CELL_DEATH	1434	0.354534	1.58585	0.004329	0.104145
GO_REGULATION_OF_PROTEIN_MODIFICATION_PROCESS	1652	0.364293	1.58483	0.0021645	0.10426
GO_TISSUE_REGENERATION	50	0.431601	1.58289	0.00227273	0.104983
GO_PROTEIN_TARGETING_TO_LYSOSOME	14	0.680731	1.58116	0.00956023	0.105613
GO_NEGATIVE_REGULATION_OF_PROTEOLYSIS	318	0.338164	1.58103	0	0.105603
GO_REGULATION_OF_PROTEIN_POLYMERIZATION	167	0.406945	1.57965	0.00652174	0.106016
GO_TISSUE_DEVELOPMENT	1492	0.338925	1.57781	0.00735294	0.106778
GO_RESPONSE_TO_LIGHT_STIMULUS	272	0.380116	1.57549	0.00225225	0.107048
GO_NEGATIVE_REGULATION_OF_MRNA_METABOLIC_PROCESS	34	0.572055	1.57445	0.00996016	0.107232
GO_NEGATIVE_REGULATION_OF_NITROGEN_COMPOUND_METABOLIC_PROCESS	1468	0.375291	1.57415	0.00419287	0.10731
GO_NEGATIVE_REGULATION_OF_CATALYTIC_ACTIVITY	804	0.339515	1.57337	0	0.107563
GO_BODY_FLUID_SECRETION	70	0.379406	1.56934	0.00268817	0.109482
GO_ANATOMICAL_STRUCTURE_HOMEOSTASIS	277	0.369405	1.56733	0.004662	0.109916
GO_GOLGI_RIBBON_FORMATION	11	0.715402	1.56499	0.00988142	0.109987
GO_RESPONSE_TO_CALCIUM_ION	113	0.366366	1.54983	0.00518135	0.11632
GO_REGULATION_OF_PROTEIN_TARGETING	293	0.382323	1.54865	0.0083682	0.116486
GO_POSITIVE_REGULATION_OF_CELLULAR_COMPONENT_BIOGENESIS	390	0.365734	1.54507	0.00869565	0.116936
GO_DEVELOPMENTAL_PROCESS_INVOLVED_IN_REPRODUCTION	589	0.329174	1.53715	0.00950119	0.120059
GO_RESPONSE_TO_ABIOTIC_STIMULUS	997	0.341804	1.53682	0	0.119964
GO_REGULATION_OF_TRANSCRIPTION_FROM_RNA_POLYMERASE_II_PROMOTER	1740	0.357073	1.53581	0.00849257	0.120227
GO_PROTEIN_OLIGOMERIZATION	428	0.341839	1.53167	0.00475059	0.122355
GO_EPITHELIAL_CELL_DIFFERENTIATION	487	0.329941	1.53163	0.00266667	0.122255
GO_PHOSPHORYLATION	1201	0.357245	1.52972	0.00217865	0.123396
GO_POSITIVE_REGULATION_OF_CATALYTIC_ACTIVITY	1475	0.351284	1.52765	0.00445434	0.124133
GO_POSITIVE_REGULATION_OF_PROTEIN_MODIFICATION_PROCESS	1097	0.345825	1.52129	0.00879121	0.126603
GO_NEGATIVE_REGULATION_OF_CELL_COMMUNICATION	1163	0.341977	1.52005	0.00867679	0.126964
GO_PHOSPHATE_CONTAINING_COMPOUND_METABOLIC_PROCESS	1927	0.346352	1.50648	0.00445434	0.132152
GO_GAMETE_GENERATION	555	0.321786	1.502	0.00952381	0.132993
GO_POSITIVE_REGULATION_OF_GROWTH	233	0.352589	1.49894	0.00954654	0.13416
GO_MULTICELLULAR_ORGANISM_REPRODUCTION	724	0.311273	1.47587	0.00501253	0.144719
GO_REGULATION_OF_CELLULAR_LOCALIZATION	1238	0.319396	1.47187	0.00705882	0.146133
GO_RESPONSE_TO_INORGANIC_SUBSTANCE	472	0.307867	1.44477	0.00837989	0.158385
GO_MULTI_ORGANISM_REPRODUCTIVE_PROCESS	846	0.286748	1.41767	0.00514139	0.172557
GO_RESPONSE_TO_METAL_ION	329	0.29399	1.40352	0.0060241	0.180052
Cellular component (102 terms)
GO_CONDENSED_CHROMOSOME	184	0.656439	2.20664	0	0
GO_CONDENSED_CHROMOSOME_CENTROMERIC_REGION	94	0.723162	2.17697	0	0
GO_SPINDLE_MIDZONE	26	0.785797	2.16705	0	0
GO_KINETOCHORE	112	0.710291	2.15011	0	0
GO_CHROMOSOMAL_REGION	319	0.633321	2.1352	0	0
GO_CHROMOSOME_CENTROMERIC_REGION	166	0.690126	2.13227	0	0.000234848
GO_SPINDLE	275	0.598496	2.10107	0	0.000604006
GO_MITOTIC_SPINDLE	51	0.680786	2.07868	0	0.00195883
GO_CHROMOSOME	849	0.556593	2.07354	0	0.0025822
GO_SPINDLE_POLE	116	0.622258	2.01949	0	0.011879
GO_SPINDLE_MICROTUBULE	57	0.654628	2.01183	0	0.0118224
GO_MIDBODY	129	0.586527	2.00492	0	0.0123644
GO_NUCLEAR_CHROMOSOME	506	0.529886	2.00347	0	0.0118027
GO_CONDENSED_NUCLEAR_CHROMOSOME	80	0.570918	1.9743	0.00227273	0.0174182
GO_HETEROCHROMATIN	66	0.585361	1.96931	0	0.0172693
GO_N_TERMINAL_PROTEIN_ACETYLTRANSFERASE_COMPLEX	9	0.828952	1.95193	0	0.0202107
GO_NUCLEAR_CHROMOSOME_TELOMERIC_REGION	128	0.581975	1.94874	0.00406504	0.0199742
GO_CHROMOSOME_TELOMERIC_REGION	158	0.568406	1.94536	0.00411523	0.0198988
GO_NUCLEAR_PORE	74	0.656983	1.94381	0	0.019016
GO_DNA_HELICASE_COMPLEX	14	0.776349	1.93043	0	0.0209803
GO_CHROMOCENTER	13	0.723534	1.92977	0	0.0200268
GO_CELL_SUBSTRATE_JUNCTION	393	0.536418	1.9114	0	0.0246189
GO_NUCLEAR_HETEROCHROMATIN	32	0.636769	1.89121	0	0.0297632
GO_ANCHORING_JUNCTION	483	0.507385	1.88906	0	0.0289573
GO_PRONUCLEUS	15	0.802142	1.8866	0	0.0289104
GO_CHROMATIN	430	0.488537	1.88431	0	0.0284741
GO_ENDOPLASMIC_RETICULUM_GOLGI_INTERMEDIATE_COMPARTMENT	97	0.538728	1.88396	0	0.0275606
GO_CELL_DIVISION_SITE	52	0.577162	1.88147	0	0.0273769
GO_REPLICATION_FORK	62	0.655969	1.87437	0.00399202	0.0287664
GO_PHOSPHATASE_COMPLEX	44	0.657518	1.87027	0	0.0290851
GO_MICROTUBULE_ORGANIZING_CENTER	589	0.496378	1.86567	0	0.0295362
GO_CONDENSED_NUCLEAR_CHROMOSOME_CENTROMERIC_REGION	16	0.780214	1.86272	0.00206186	0.0294003
GO_CYTOSKELETAL_PART	1375	0.4309	1.857	0	0.0306624
GO_MICROTUBULE_CYTOSKELETON	1012	0.472512	1.85305	0	0.0305908
GO_CENTROSOME	467	0.502978	1.84346	0	0.0351716
GO_PROTEIN_KINASE_COMPLEX	89	0.543922	1.82262	0	0.043122
GO_DESMOSOME	26	0.623406	1.82227	0.00632911	0.042284
GO_NUCLEAR_CHROMATIN	285	0.470855	1.82059	0.00219298	0.0416631
GO_NUCLEOLUS	820	0.502255	1.81871	0.00411523	0.0414173
GO_PERICENTRIC_HETEROCHROMATIN	14	0.750314	1.81571	0.00197628	0.0416968
GO_RIBONUCLEOPROTEIN_GRANULE	142	0.526553	1.81428	0.0021692	0.0411952
GO_ACTOMYOSIN	61	0.55846	1.80681	0.00635593	0.0439746
GO_CYTOSKELETON	1883	0.419793	1.80606	0	0.0435331
GO_NUCLEAR_PERIPHERY	118	0.546744	1.7981	0	0.0458452
GO_HISTONE_METHYLTRANSFERASE_COMPLEX	64	0.593471	1.79471	0	0.0462026
GO_CYCLIN_DEPENDENT_PROTEIN_KINASE_HOLOENZYME_COMPLEX	30	0.614134	1.79355	0	0.0455832
GO_CYTOPLASMIC_STRESS_GRANULE	31	0.629587	1.7879	0.00204918	0.047631
GO_INO80_TYPE_COMPLEX	21	0.656712	1.78415	0.00201613	0.0481319
GO_TRANSFERASE_COMPLEX	671	0.510042	1.78405	0	0.0472113
GO_GOLGI_CISTERNA_MEMBRANE	72	0.503393	1.78187	0	0.047196
GO_TRANSCRIPTION_FACTOR_TFTC_COMPLEX	14	0.709624	1.78021	0.0040568	0.0468991
GO_METHYLTRANSFERASE_COMPLEX	83	0.581748	1.77719	0	0.0476454
GO_NUCLEAR_INNER_MEMBRANE	52	0.486607	1.77111	0	0.049256
GO_SEX_CHROMOSOME	27	0.653185	1.7687	0	0.0497532
GO_MICROTUBULE_PLUS_END	16	0.721587	1.76858	0.00204918	0.0488974
GO_NUCLEAR_MATRIX	95	0.541274	1.76825	0	0.0481386
GO_GOLGI_STACK	122	0.485422	1.76055	0	0.0516761
GO_NUCLEAR_ENVELOPE	400	0.455013	1.75501	0	0.0539643
GO_TRANSFERASE_COMPLEX_TRANSFERRING_PHOSPHORUS_CONTAINING_GROUPS	233	0.506994	1.75304	0	0.0539639
GO_DNA_DIRECTED_RNA_POLYMERASE_II_HOLOENZYME	95	0.548629	1.75231	0	0.0535361
GO_CELL_CORTEX	233	0.435202	1.73925	0.00468384	0.059775
GO_PROTEIN_PHOSPHATASE_TYPE_2A_COMPLEX	20	0.644387	1.73817	0.00417537	0.0596366
GO_VESICLE_COAT	44	0.595789	1.73492	0.00204499	0.0601167
GO_XY_BODY	15	0.658657	1.73463	0.0020284	0.0592496
GO_CATALYTIC_COMPLEX	995	0.47142	1.73359	0.0021322	0.0588278
GO_COPI_COATED_VESICLE_MEMBRANE	16	0.715192	1.7327	0.00996016	0.0588334
GO_NUCLEOPLASM_PART	672	0.507739	1.7267	0.00617284	0.061413
GO_COATED_VESICLE	228	0.463869	1.7252	0	0.0615131
GO_NUCLEAR_MEMBRANE	269	0.446383	1.72274	0	0.061927
GO_GOLGI_CISTERNA	90	0.475893	1.72171	0	0.0609394
GO_FILOPODIUM	92	0.465073	1.71989	0.00497512	0.0603255
GO_SITE_OF_DOUBLE_STRAND_BREAK	31	0.613008	1.71916	0.00402414	0.0599851
GO_MICROTUBULE_END	21	0.663275	1.70888	0.00609756	0.0638508
GO_BETA_CATENIN_DESTRUCTION_COMPLEX	14	0.641227	1.70531	0.00662252	0.0632915
GO_GOLGI_ASSOCIATED_VESICLE	79	0.501408	1.70296	0.00424628	0.0638386
GO_RNA_POLYMERASE_COMPLEX	120	0.527403	1.70287	0.00801603	0.0630965
GO_LATERAL_PLASMA_MEMBRANE	49	0.484604	1.7011	0.00717703	0.0625677
GO_MICROTUBULE	387	0.430536	1.69604	0	0.0639313
GO_CATALYTIC_STEP_2_SPLICEOSOME	86	0.60531	1.68932	0.00803213	0.0668471
GO_CYTOPLASMIC_UBIQUITIN_LIGASE_COMPLEX	13	0.645566	1.68572	0.00793651	0.0679619
GO_COATED_VESICLE_MEMBRANE	133	0.469068	1.68422	0.0021645	0.0682335
GO_ESCRT_III_COMPLEX	11	0.750745	1.67792	0.00785855	0.0696175
GO_SPLICEOSOMAL_COMPLEX	165	0.553012	1.67175	0.00816326	0.070717
GO_PRE_AUTOPHAGOSOMAL_STRUCTURE_MEMBRANE	14	0.673002	1.65627	0.00772201	0.0721408
GO_MICROTUBULE_ORGANIZING_CENTER_PART	138	0.468508	1.6543	0.00865801	0.071513
GO_NUCLEAR_OUTER_MEMBRANE_ENDOPLASMIC_RETICULUM_MEMBRANE_NETWORK	959	0.391009	1.64889	0	0.0735701
GO_ORGANELLE_SUBCOMPARTMENT	299	0.439063	1.64853	0.00840336	0.0725835
GO_GOLGI_APPARATUS_PART	859	0.398919	1.64831	0.00221729	0.0720657
GO_ENDOPLASMIC_RETICULUM_PART	1114	0.381757	1.64751	0.00240385	0.0717568
GO_EXTRINSIC_COMPONENT_OF_ORGANELLE_MEMBRANE	25	0.550901	1.64064	0.00603622	0.0721228
GO_GOLGI_MEMBRANE	676	0.411994	1.63893	0.00429185	0.0725089
GO_CORTICAL_CYTOSKELETON	79	0.442415	1.63711	0.00697674	0.0722445
GO_CYTOPLASMIC_REGION	278	0.412313	1.6366	0.00714286	0.0720368
GO_CCR4_NOT_COMPLEX	14	0.679199	1.63606	0.0059761	0.0718009
GO_RNA_POLYMERASE_II_TRANSCRIPTION_FACTOR_COMPLEX	101	0.470586	1.63486	0.00867679	0.0708437
GO_SUPRAMOLECULAR_FIBER	646	0.360284	1.62775	0	0.0730209
GO_CELL_CELL_JUNCTION	377	0.375222	1.62354	0.00486618	0.0741921
GO_GOLGI_APPARATUS	1386	0.392864	1.61875	0.00683371	0.0759031
GO_CELL_JUNCTION	1130	0.358205	1.60583	0.00533333	0.0778806
GO_PERINUCLEAR_REGION_OF_CYTOPLASM	628	0.371639	1.59778	0.00461894	0.0794795
GO_ENDOPLASMIC_RETICULUM	1549	0.35385	1.57456	0.002457	0.0850082
GO_TRANSCRIPTION_FACTOR_COMPLEX	294	0.381306	1.56213	0.00945627	0.0908887
Molecular function (41 terms)
GO_FOUR_WAY_JUNCTION_DNA_BINDING	15	0.804624	1.95493	0	0.211307
GO_DNA_DEPENDENT_ATPASE_ACTIVITY	78	0.655502	1.8421	0.0020284	0.221015
GO_STRUCTURE_SPECIFIC_DNA_BINDING	118	0.519698	1.83651	0	0.205014
GO_GDP_BINDING	49	0.628866	1.82956	0.00402414	0.198515
GO_LIGAND_DEPENDENT_NUCLEAR_RECEPTOR_TRANSCRIPTION_COACTIVATOR_ACTIVITY	51	0.580418	1.8204	0	0.196323
GO_SINGLE_STRANDED_DNA_BINDING	82	0.604028	1.81847	0	0.183639
GO_POLY_A_RNA_BINDING	1136	0.537131	1.81253	0.00409836	0.180106
GO_NUCLEOSOME_BINDING	45	0.619416	1.80705	0	0.17778
GO_POLY_PURINE_TRACT_BINDING	18	0.724473	1.8027	0	0.174835
GO_RNA_BINDING	1538	0.51689	1.80257	0.00419287	0.163757
GO_UBIQUITIN_LIKE_PROTEIN_LIGASE_BINDING	262	0.490102	1.79804	0	0.161026
GO_PROTEIN_PHOSPHATASE_BINDING	118	0.504888	1.79626	0	0.154861
GO_MRNA_BINDING	149	0.522308	1.79224	0	0.151889
GO_EXONUCLEASE_ACTIVITY	73	0.564173	1.78966	0	0.147834
GO_NF_KAPPAB_BINDING	30	0.633507	1.77917	0.00209205	0.154614
GO_STRUCTURAL_CONSTITUENT_OF_NUCLEAR_PORE	13	0.800567	1.77683	0	0.152064
GO_EXONUCLEASE_ACTIVITY_ACTIVE_WITH_EITHER_RIBO_OR_DEOXYRIBONUCLEIC_ACIDS_AND_PRODUCING_5_PHOSPHOMONOESTERS	42	0.609406	1.77535	0.00203252	0.14695
GO_DNA_SECONDARY_STRUCTURE_BINDING	24	0.665123	1.77107	0.00808081	0.14726
GO_CHROMATIN_DNA_BINDING	80	0.499047	1.76706	0.00222222	0.146597
GO_UBIQUITIN_LIKE_PROTEIN_CONJUGATING_ENZYME_ACTIVITY	29	0.662609	1.7667	0.00201613	0.140879
GO_HELICASE_ACTIVITY	150	0.579794	1.76666	0.00417537	0.13546
GO_DNA_BINDING_BENDING	20	0.599403	1.7654	0.00657895	0.132075
GO_GTPASE_BINDING	288	0.464586	1.76093	0.00431965	0.128465
GO_PROTEIN_PHOSPHATASE_2A_BINDING	28	0.608898	1.75847	0	0.127424
GO_UBIQUITIN_LIKE_PROTEIN_LIGASE_ACTIVITY	196	0.510352	1.7547	0	0.127508
GO_SINGLE_STRANDED_DNA_DEPENDENT_ATPASE_ACTIVITY	13	0.815492	1.75423	0.0059761	0.123862
GO_ENZYME_BINDING	1708	0.434441	1.75206	0	0.122239
GO_DNA_HELICASE_ACTIVITY	52	0.656301	1.75052	0.00616016	0.120822
GO_MACROMOLECULAR_COMPLEX_BINDING	1360	0.414837	1.74868	0	0.120356
GO_RETINOIC_ACID_RECEPTOR_BINDING	42	0.552149	1.74649	0.00736648	0.118942
GO_MRNA_3_UTR_BINDING	47	0.577075	1.73952	0.00442478	0.116863
GO_TRANSFERASE_ACTIVITY_TRANSFERRING_HEXOSYL_GROUPS	189	0.42655	1.73165	0.00483092	0.122328
GO_OXIDOREDUCTASE_ACTIVITY_ACTING_ON_PAIRED_DONORS_WITH_INCORPORATION_OR_REDUCTION_OF_MOLECULAR_OXYGEN_2_OXOGLUTARATE_AS_ONE_DONOR_AND_INCORPORATION_OF_ONE_ATOM_EACH_OF_OXYGEN_INTO_BOTH_DONORS	39	0.547652	1.72708	0.00426439	0.124696
GO_SINGLE_STRANDED_RNA_BINDING	63	0.529727	1.72628	0.00856531	0.122511
GO_PEPTIDE_N_ACETYLTRANSFERASE_ACTIVITY	63	0.590183	1.72554	0.00210084	0.120177
GO_DAMAGED_DNA_BINDING	62	0.573718	1.7211	0.00417537	0.121446
GO_PHOSPHATASE_BINDING	160	0.470264	1.71929	0	0.120632
GO_ATP_DEPENDENT_DNA_HELICASE_ACTIVITY	33	0.658444	1.71567	0.00816326	0.122079
GO_HYDROLASE_ACTIVITY_ACTING_ON_ACID_ANHYDRIDES	797	0.424879	1.70945	0	0.121599
GO_TRANSFERASE_ACTIVITY_TRANSFERRING_GLYCOSYL_GROUPS	265	0.403124	1.70799	0	0.118591
GO_CHROMATIN_BINDING	424	0.444574	1.70595	0.00227273	0.118249
GO_KINASE_BINDING	595	0.423425	1.70279	0.00232019	0.114495
GO_CYCLIN_DEPENDENT_PROTEIN_KINASE_ACTIVITY	34	0.554567	1.70267	0	0.112654
GO_NUCLEOTIDYLTRANSFERASE_ACTIVITY	123	0.510342	1.70183	0.00623701	0.111506
GO_RAN_GTPASE_BINDING	31	0.63908	1.69813	0.00831601	0.110909
GO_PROTEIN_COMPLEX_BINDING	907	0.405223	1.69452	0	0.112173
GO_GTPASE_ACTIVITY	238	0.440581	1.69301	0	0.111588
GO_SMAD_BINDING	70	0.519628	1.69163	0.00847458	0.109627
GO_NUCLEOCYTOPLASMIC_TRANSPORTER_ACTIVITY	24	0.681734	1.68289	0.00976562	0.113674
GO_CORE_PROMOTER_BINDING	148	0.468654	1.68285	0.00686499	0.112009
GO_PROTEIN_TYROSINE_KINASE_BINDING	53	0.469649	1.68081	0.00665188	0.11091
GO_TBP_CLASS_PROTEIN_BINDING	20	0.644545	1.68019	0.00398406	0.109683
GO_ATPASE_ACTIVITY	416	0.437729	1.67915	0.00440529	0.109235
GO_RIBONUCLEOTIDE_BINDING	1799	0.403679	1.6718	0.00223714	0.112647
GO_ADENYL_NUCLEOTIDE_BINDING	1467	0.406126	1.66972	0	0.111213
GO_TRANSCRIPTION_COREPRESSOR_ACTIVITY	215	0.431512	1.65394	0.00663717	0.11555
GO_RNA_POLYMERASE_II_CARBOXY_TERMINAL_DOMAIN_KINASE_ACTIVITY	16	0.680167	1.64902	0.00986193	0.114347
GO_ATPASE_ACTIVITY_COUPLED	309	0.43538	1.64889	0.00883002	0.113108
GO_PROTEIN_C_TERMINUS_BINDING	184	0.435224	1.64708	0.00231481	0.11104
GO_CYCLIN_BINDING	19	0.591729	1.64559	0.00447427	0.110951
GO_PROTEIN_SERINE_THREONINE_KINASE_ACTIVITY	436	0.418105	1.63042	0.00875273	0.115253
GO_HISTONE_LYSINE_N_METHYLTRANSFERASE_ACTIVITY	40	0.516733	1.62753	0.00913242	0.114394
GO_ENHANCER_BINDING	92	0.431788	1.61755	0.00945627	0.116009
GO_CYTOSKELETAL_PROTEIN_BINDING	795	0.379166	1.61101	0.00240964	0.114798
GO_MICROTUBULE_BINDING	193	0.438586	1.60463	0.00684931	0.11931
GO_ISOMERASE_ACTIVITY	156	0.397531	1.59884	0.00656455	0.119825
GO_TRANSFERASE_ACTIVITY_TRANSFERRING_PHOSPHORUS_CONTAINING_GROUPS	961	0.381052	1.58565	0.00461894	0.120194
GO_ENZYME_REGULATOR_ACTIVITY	922	0.342721	1.58007	0.00249377	0.120727
GO_IDENTICAL_PROTEIN_BINDING	1177	0.347388	1.57171	0	0.121544
GO_PEPTIDASE_ACTIVITY	590	0.291824	1.42684	0	0.177363
GO_ENZYME_INHIBITOR_ACTIVITY	358	0.272332	1.37533	0.00692042	0.201374
C6 Oncological signature (23 terms)
BIOCARTA_MAL_PATHWAY	19	0.686239	1.85626	0	0.222197
BIOCARTA_AGR_PATHWAY	36	0.570065	1.84305	0.00213675	0.136692
BIOCARTA_HIF_PATHWAY	15	0.722549	1.79799	0.00967118	0.163157
BIOCARTA_RAS_PATHWAY	23	0.687	1.79036	0.003663	0.13285
BIOCARTA_ECM_PATHWAY	24	0.68127	1.77885	0.00389105	0.124494
BIOCARTA_ATRBRCA_PATHWAY	21	0.695803	1.76757	0.00192678	0.117528
BIOCARTA_PTC1_PATHWAY	11	0.784176	1.74962	0.00193424	0.11088
BIOCARTA_EIF_PATHWAY	16	0.74127	1.74725	0.00365631	0.101491
BIOCARTA_IGF1_PATHWAY	21	0.681948	1.7373	0.00587084	0.105162
BIOCARTA_G1_PATHWAY	28	0.619037	1.7372	0.00195695	0.095602
BIOCARTA_INSULIN_PATHWAY	22	0.643208	1.73349	0.00986193	0.0837554
BIOCARTA_BCELLSURVIVAL_PATHWAY	16	0.687833	1.73222	0.00185185	0.0788126
BIOCARTA_RAB_PATHWAY	12	0.745504	1.73222	0.00396825	0.0735584
BIOCARTA_TFF_PATHWAY	21	0.635109	1.72167	0.0075188	0.0752465
BIOCARTA_VEGF_PATHWAY	29	0.611513	1.70197	0.00362319	0.0775657
BIOCARTA_CELLCYCLE_PATHWAY	23	0.624076	1.70041	0.00408998	0.0753583
BIOCARTA_MTOR_PATHWAY	23	0.659166	1.69831	0.00759013	0.0733146
BIOCARTA_RANMS_PATHWAY	10	0.839989	1.67924	0.00589391	0.077455
BIOCARTA_IGF1MTOR_PATHWAY	20	0.646904	1.67489	0.00588235	0.0747115
BIOCARTA_TNFR1_PATHWAY	29	0.607013	1.6616	0.0094518	0.0781223
BIOCARTA_EIF2_PATHWAY	11	0.753157	1.65281	0.00377358	0.0773907
BIOCARTA_AT1R_PATHWAY	33	0.556775	1.63557	0.0094697	0.0830993
BIOCARTA_FAS_PATHWAY	30	0.62871	1.62525	0.00764818	0.0889557

## Sheet: low risk
Gene set enrichment analyses between high and low risk group in 165 TCGA PAAD Samples
Terms enriched in low risk group
NAME	SIZE	ES	NES	NOM p-val	FDR q-val
C2 KEGG (1 terms)
KEGG_MATURITY_ONSET_DIABETES_OF_THE_YOUNG	25	-0.759429	-1.86043	0.00352734	0.100256
C5
Biological process (0 terms)
Cellular component (0 terms)
Molecular function (0 terms)
C6 Oncological signature (0 terms)
